# Supplementary material
Source: PubMed Central journal article supplement (PMC4727541)
Supplement: NIHMS750981-supplement-SI.pdf [file NIHMS750981-supplement-SI.pdf]

## Supplementary information

### Novel terpenes generated by heterologous expression of bacterial terpene synthase genes in an engineered *Streptomyces* host.

Yuuki Yamada<sup>1</sup>, Shiho Arima<sup>2</sup>, Tohru Nagamitsu<sup>2</sup>, Kohei Johmoto<sup>3</sup>, Hidehiro Uekusa<sup>3</sup>, Tadashi Eguchi<sup>3</sup>, Kazuo Shin'ya<sup>4</sup>, David E. Cane<sup>5</sup> and Haruo Ikeda<sup>1§</sup>

<sup>1</sup>Kitasato Institute for Life Sciences, Kitasato University, Kitasato, Sagamihara, Kanagawa 252-0373, Japan, <sup>2</sup>School of Pharmacy, Kitasato University, Shirokane, Minato-ku, Tokyo 108-8641 Japan, <sup>3</sup>Department of Chemistry and Materials Science, Tokyo Institute of Technology, O-okayama, Meguro-ku, Tokyo 152-8551, Japan, <sup>4</sup>National Institute of Advanced Industrial Science and Technology, Aomi, Koto-ku, Tokyo 135-0064, Japan, and <sup>5</sup>Department of Chemistry, Box H, Brown University, Providence, RI 02912-9108, USA.

§ To whom correspondence should be addressed.

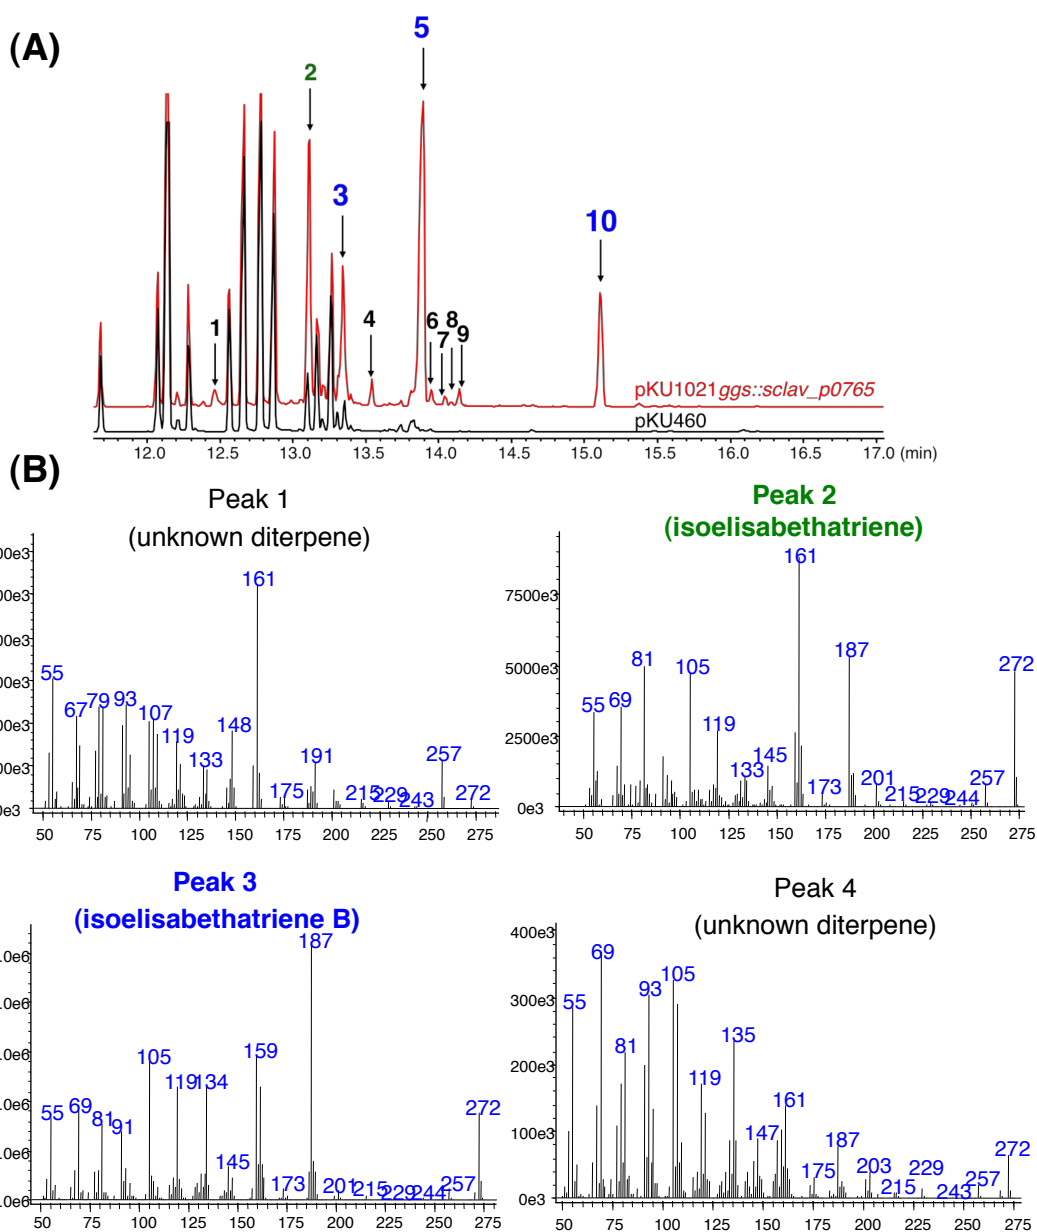

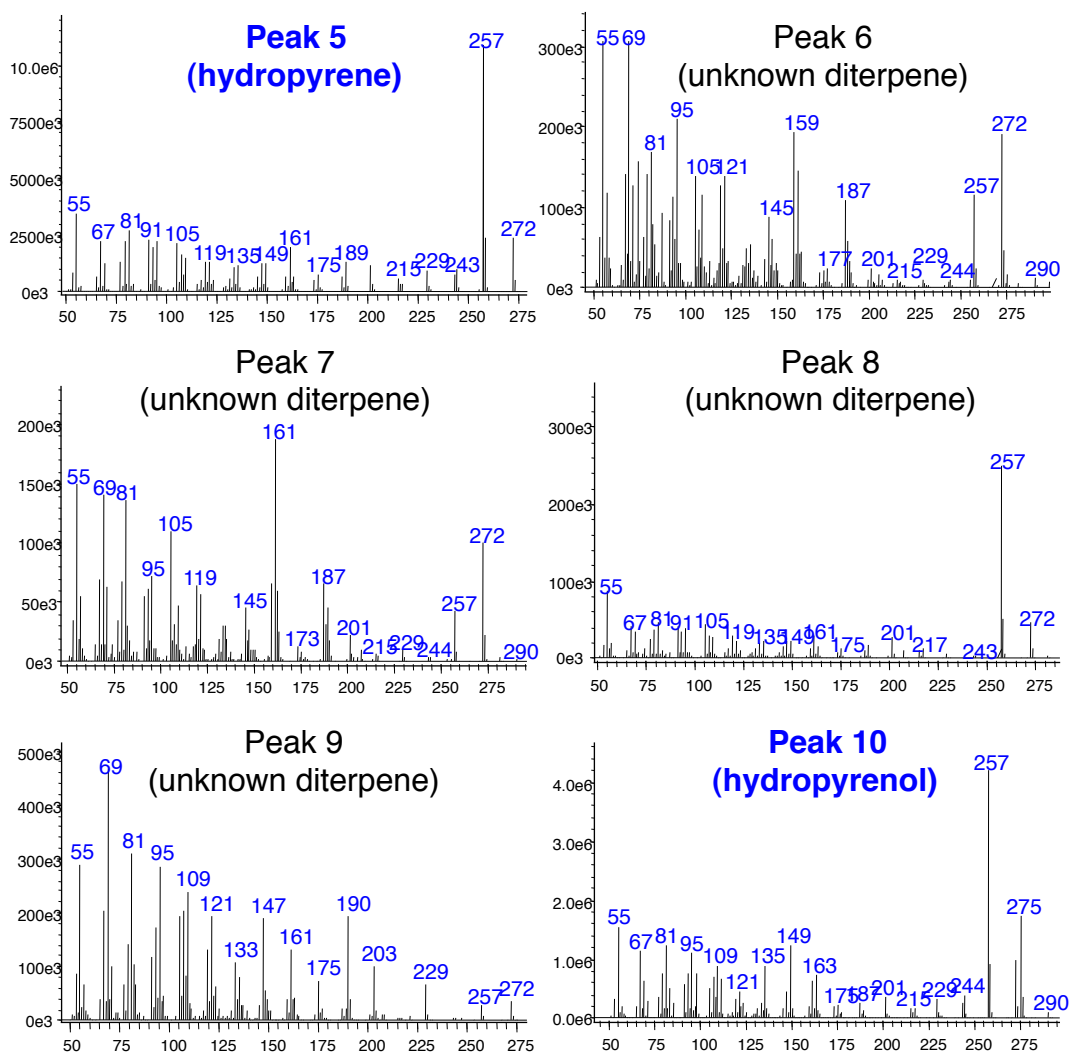

**Figure S1.** GC-MS of an *n*-hexane extract of *S. avermitilis* SUKA22 carrying *sclav\_p0765* (A) and EI-MS fragmentation of each peak (B). Three peaks, 3, 5, and 10 correspond to isolisabethatriene B (**3**), hydroperene (**1**) and hydroperenol (**2**), respectively. A peak 2 is isolisabethatriene.

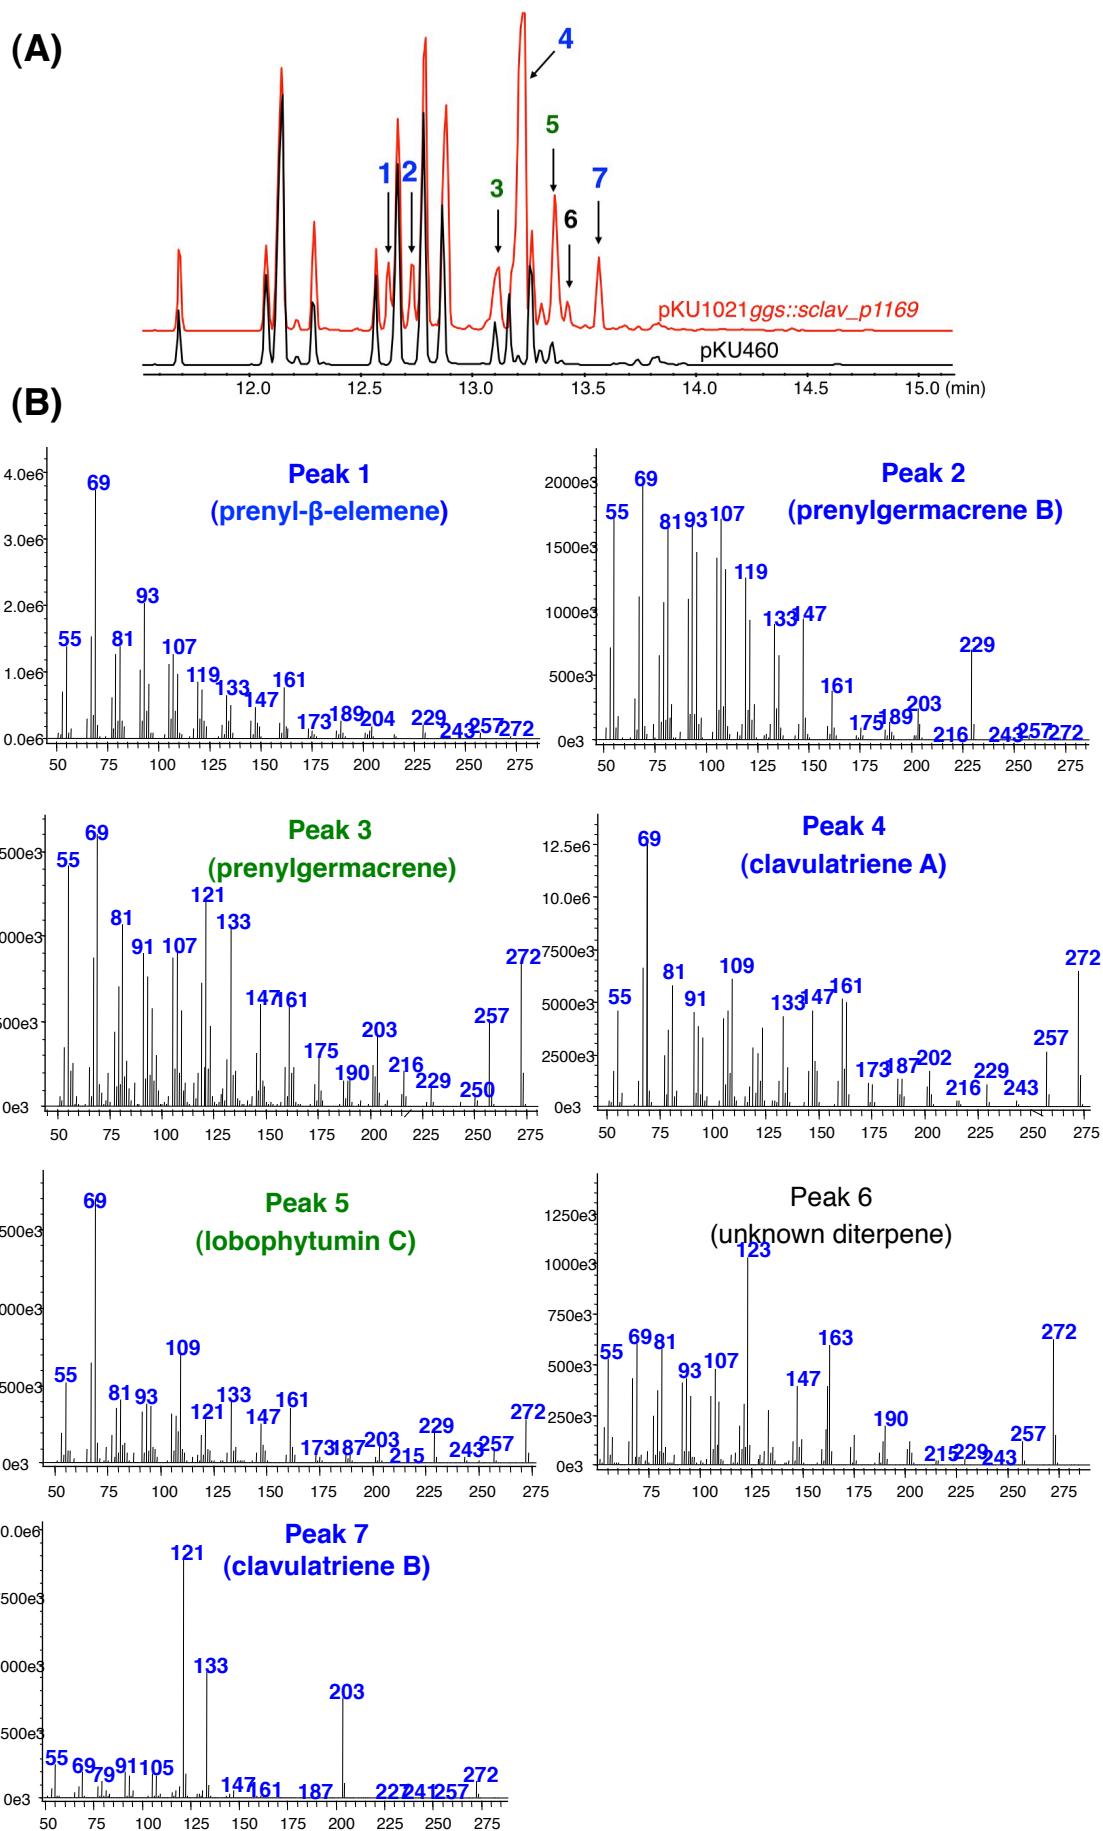

**Figure S2.** GC-MS of an *n*-hexane extract of *S. avermitilis* SUKA22 carrying *sclav\_p1169* (A) and EI-MS fragmentation of each peak (B). Four peaks (in blue), 1, 2, 4, and 7 correspond to prenyl- $\beta$ -elemene (6), prenylgermacrene (7), clavulatriene A (4) and clavulatriene B (5), respectively. Two peaks 3 and 5 are prenylgermacrene and lobophytumin C,

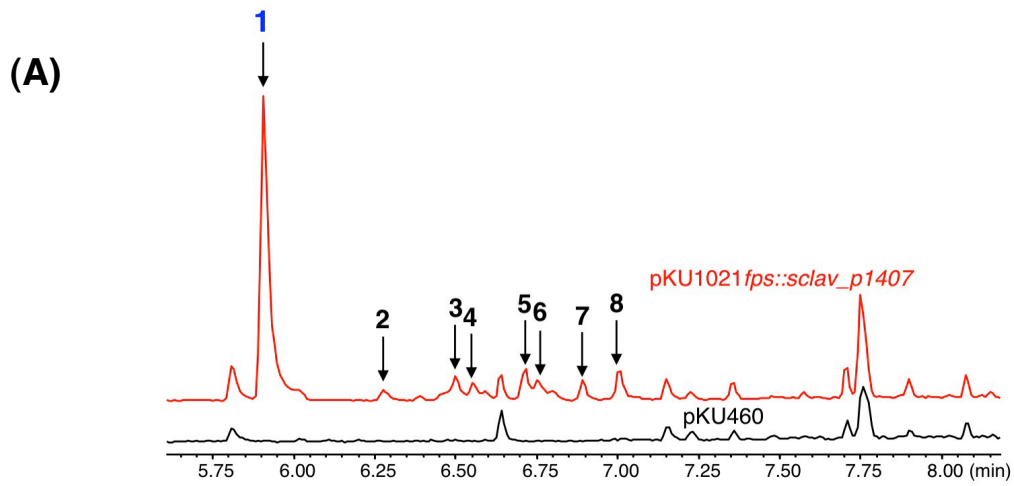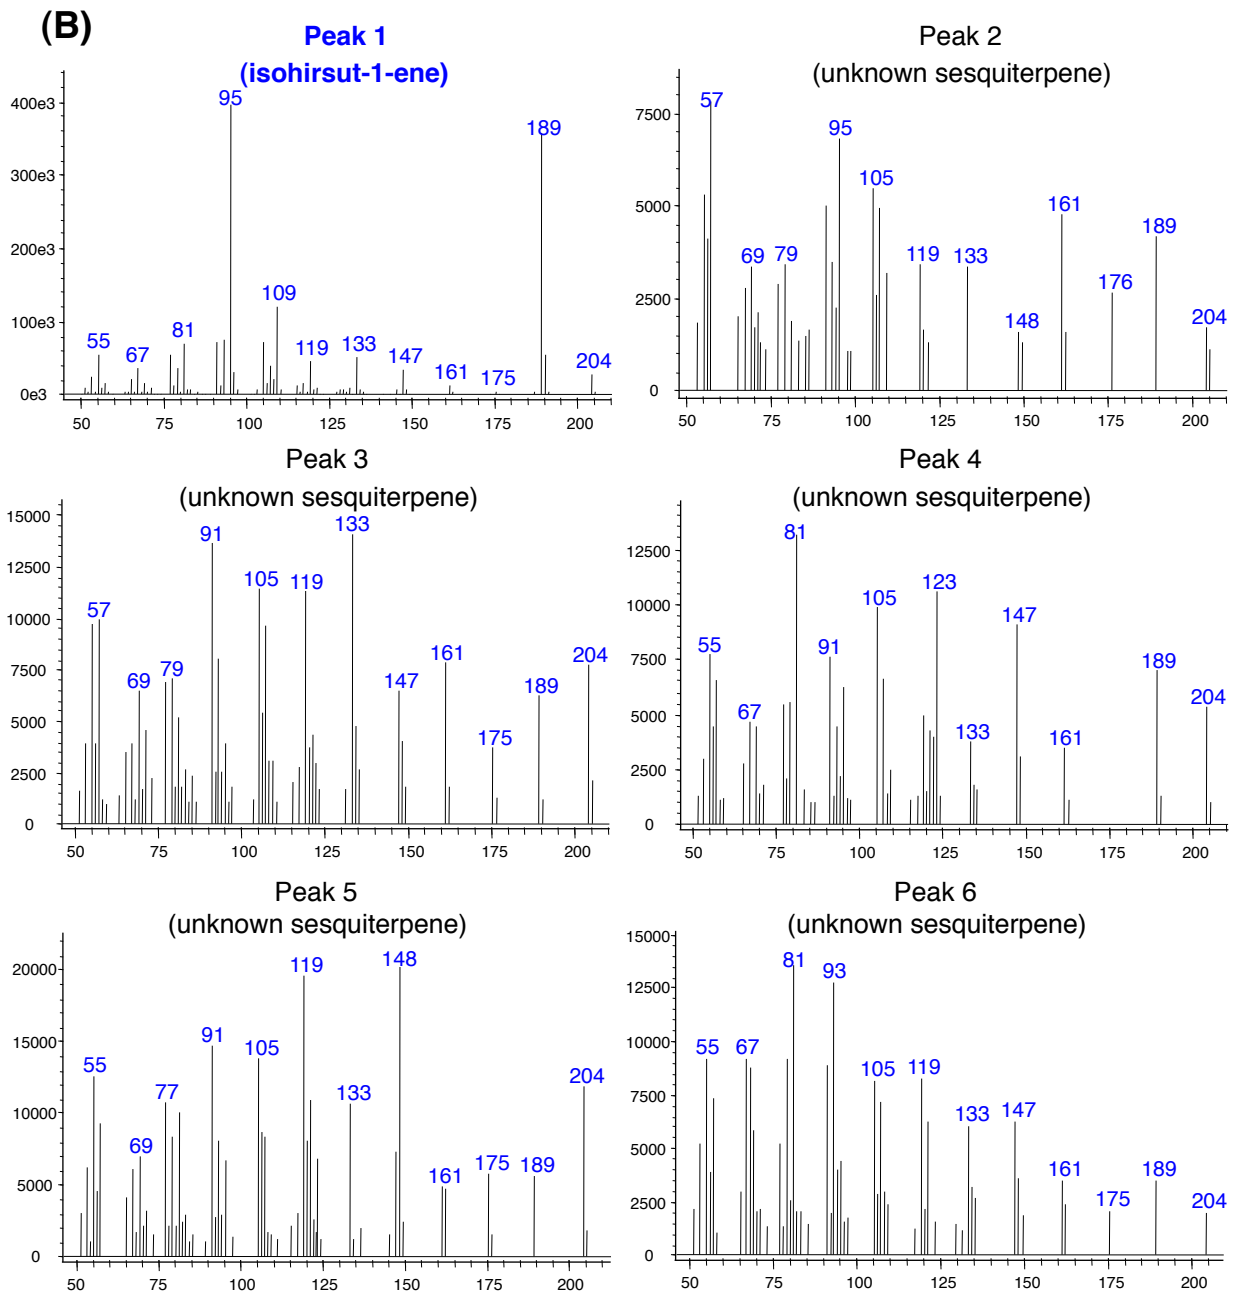



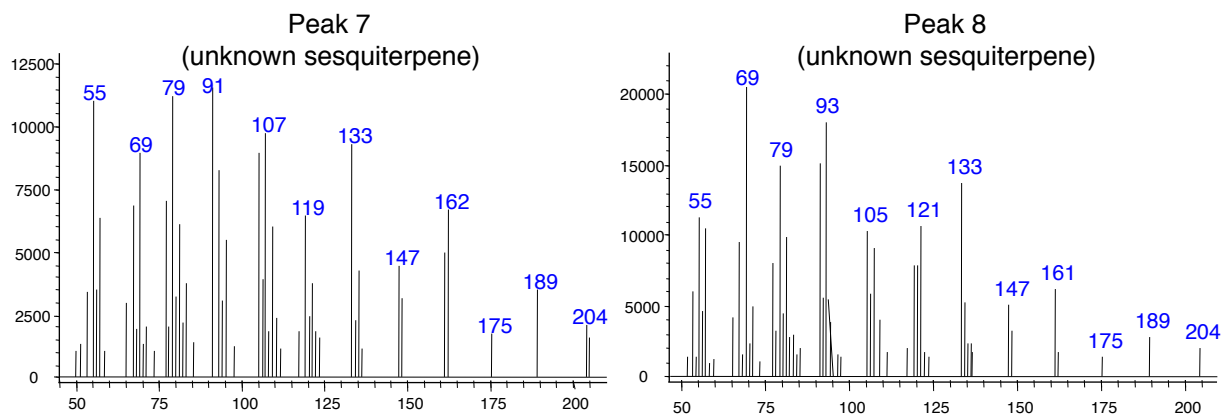

**Figure S3.** GC-MS of an *n*-hexane extract of *S. avermitilis* SUKA22 carrying *sclav\_p1407* (A) and EI-MS fragmentation of each peak (B). A peak 1 corresponds to isohirsut-1-ene (**8**).

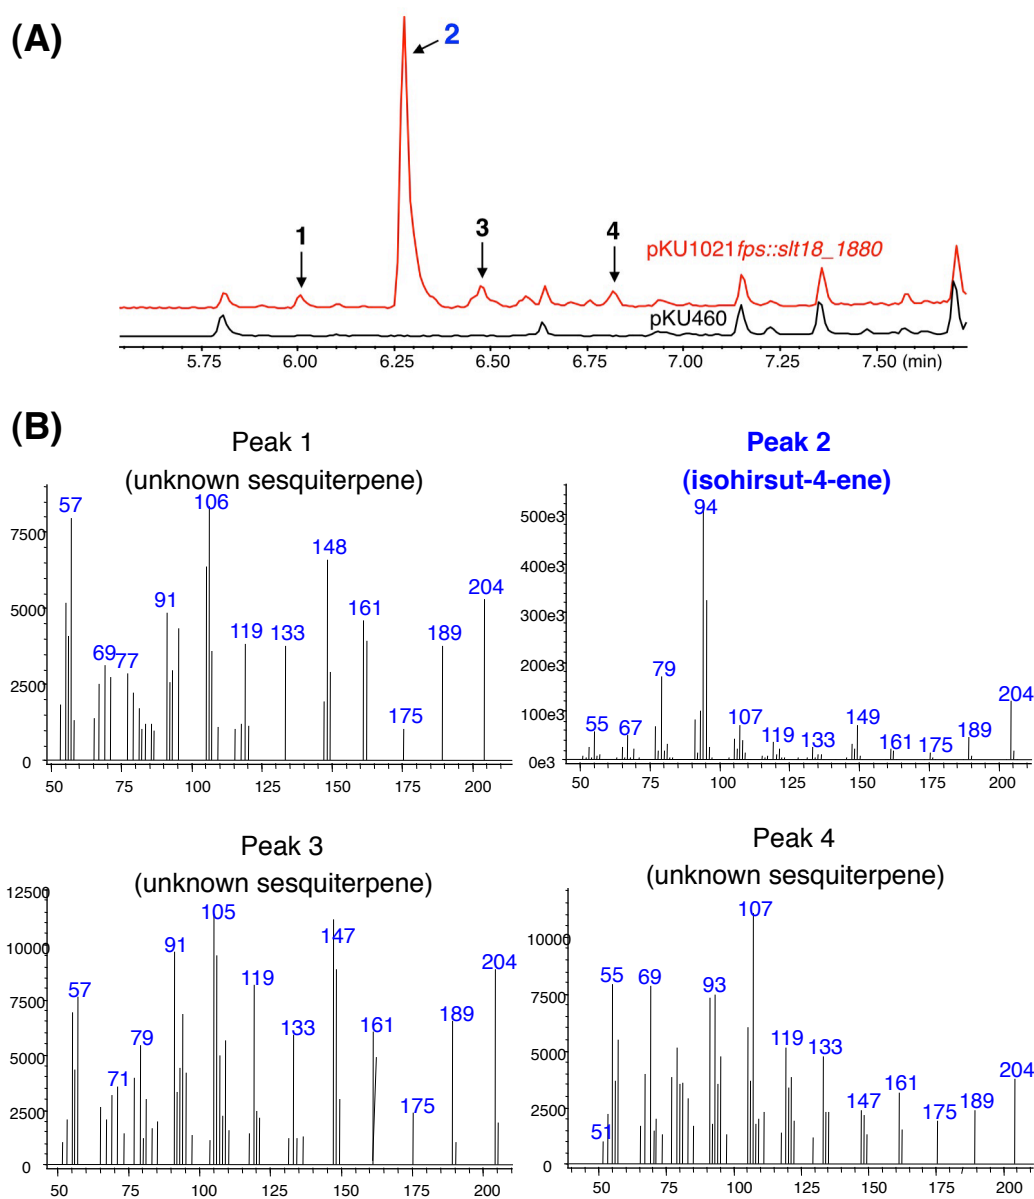

**Figure S4.** GC-MS of an *n*-hexane extract of *S. avermitilis* SUKA22 carrying *slt18\_p1880* (A) and EI-MS fragmentation of each peak (B). A peak 2 corresponds to isohirsut-4-ene (**9**).

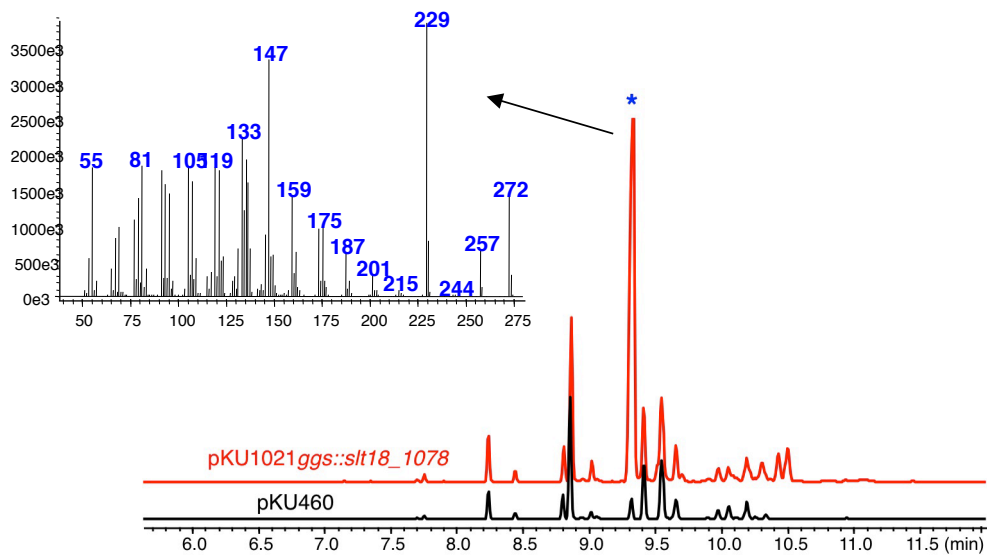

**Figure S5.** GC-MS of an *n*-hexane extract of *S. avermitilis* SUKA22 carrying *slt18\_p1078* and EI-MS fragmentation. An asterisk corresponds to cyclooctat-7(8),10(14)-diene (**10**).

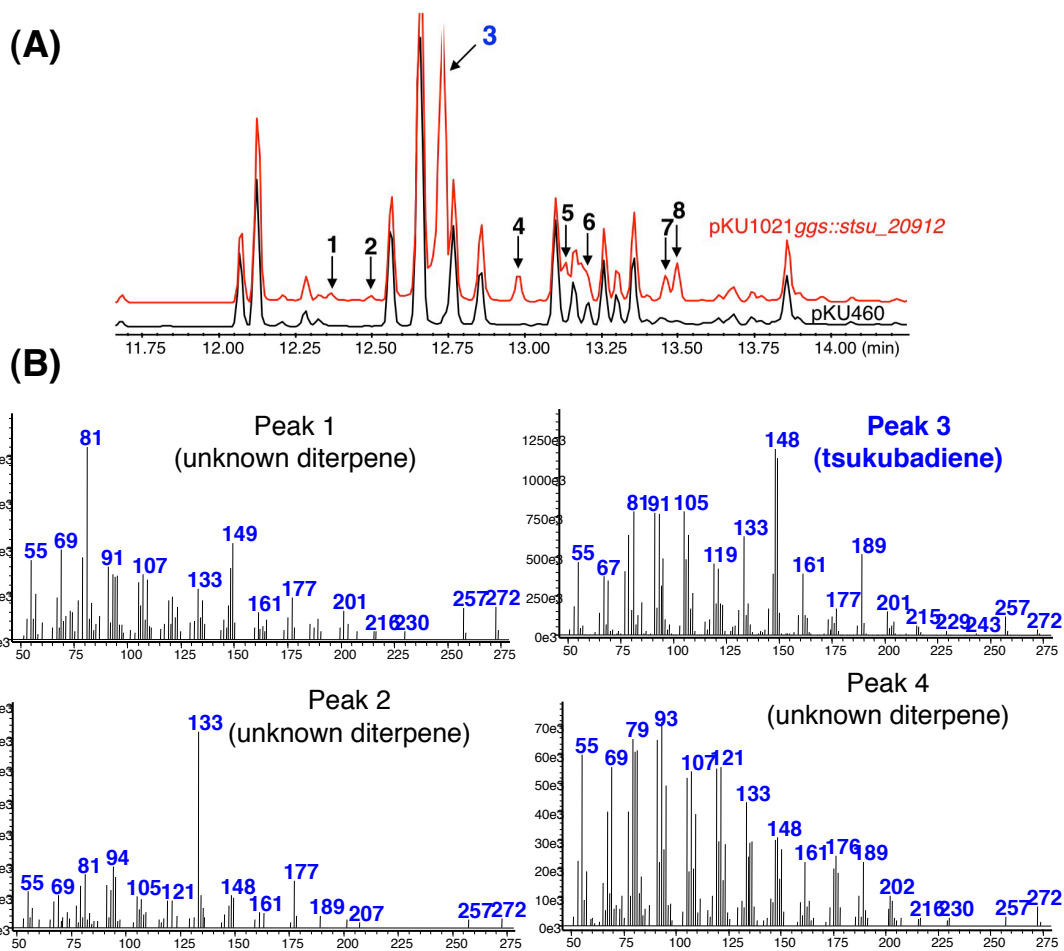

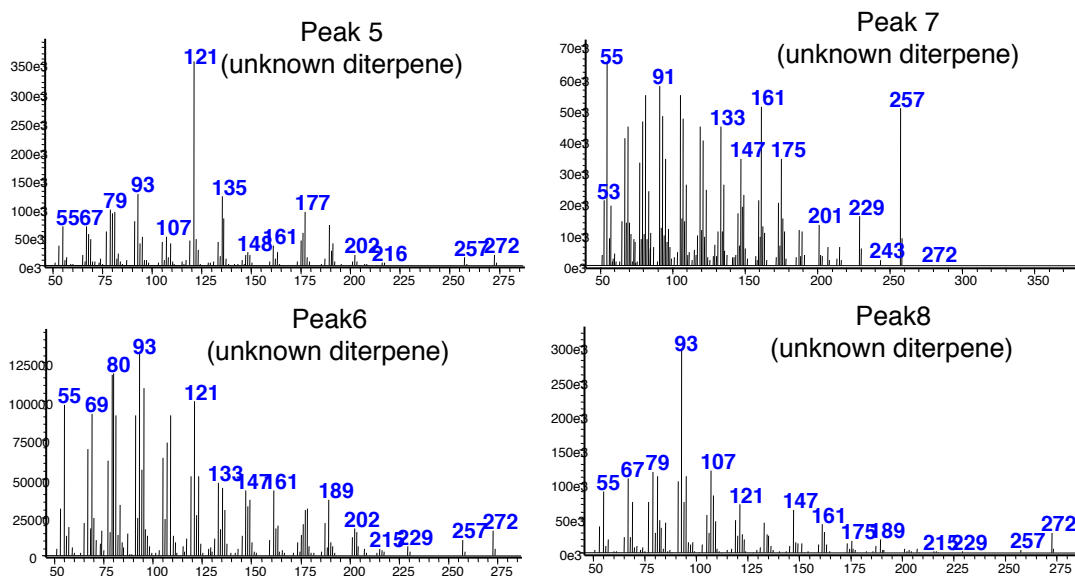

**Figure S6.** GC-MS of an *n*-hexane extract of *S. avermitilis* SUKA22 carrying *sts\_u20912* (A) and EI-MS fragmentation of each peak (B). A peak 3 corresponds to tsukubadiene (**11**).

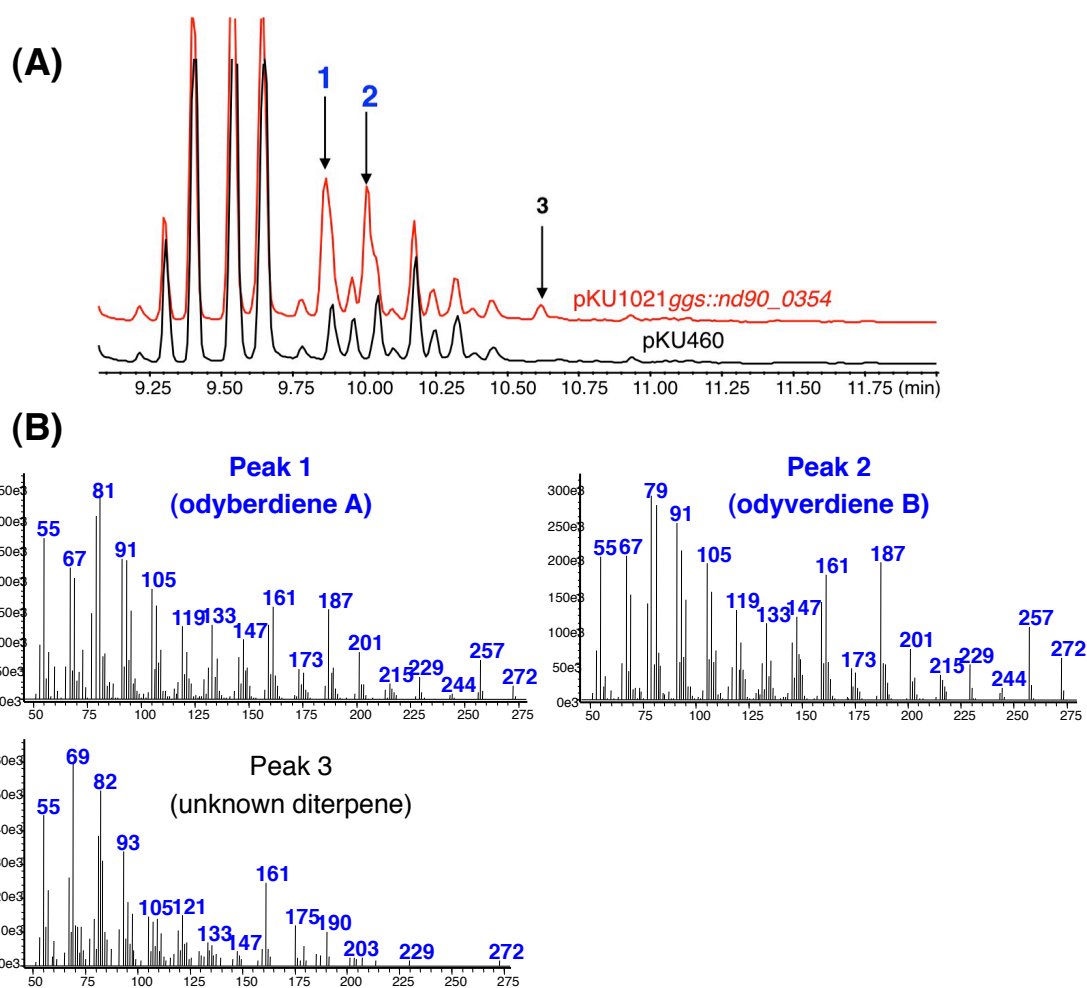

**Figure S7.** GC-MS of an *n*-hexane extract of *S. avermitilis* SUKA22 carrying *nd90\_0354* (A) and EI-MS fragmentation of each peak (B). Two peaks, 1 and 2, correspond to odyverdiene A (**12**) and B (**13**), respectively.

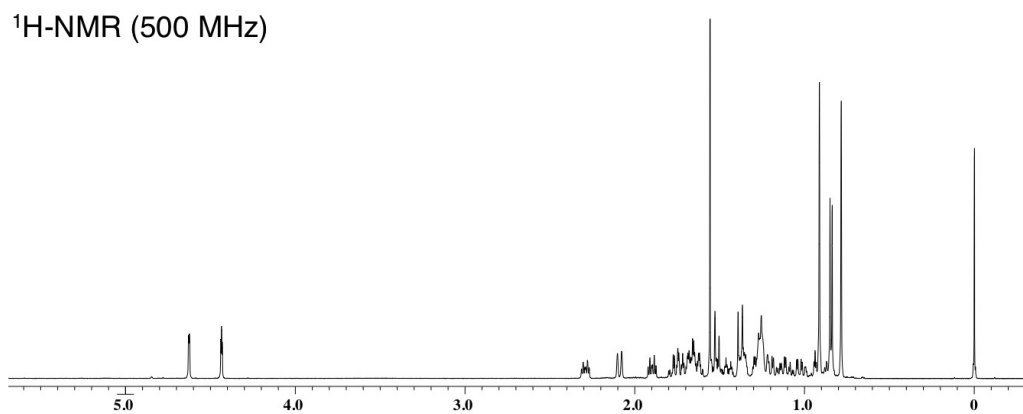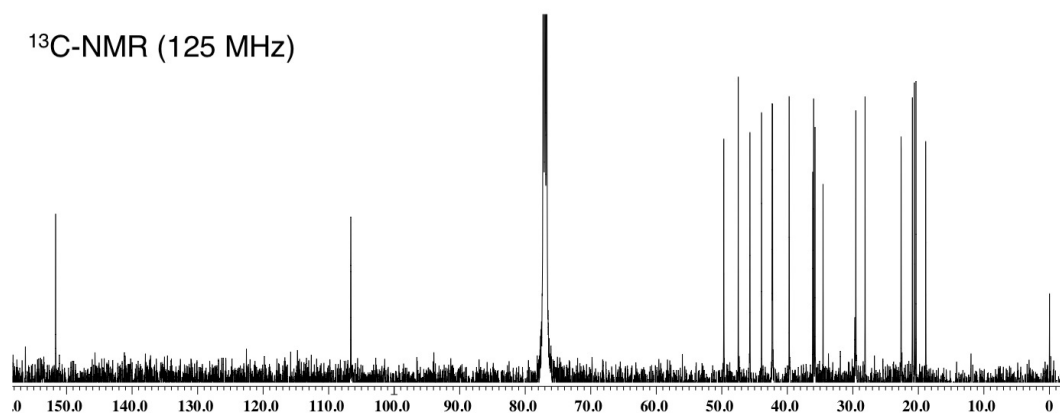

Figure S8.  $^1\text{H}$  (upper) and  $^{13}\text{C}$  (lower) NMR of hydropyrene (**1**).

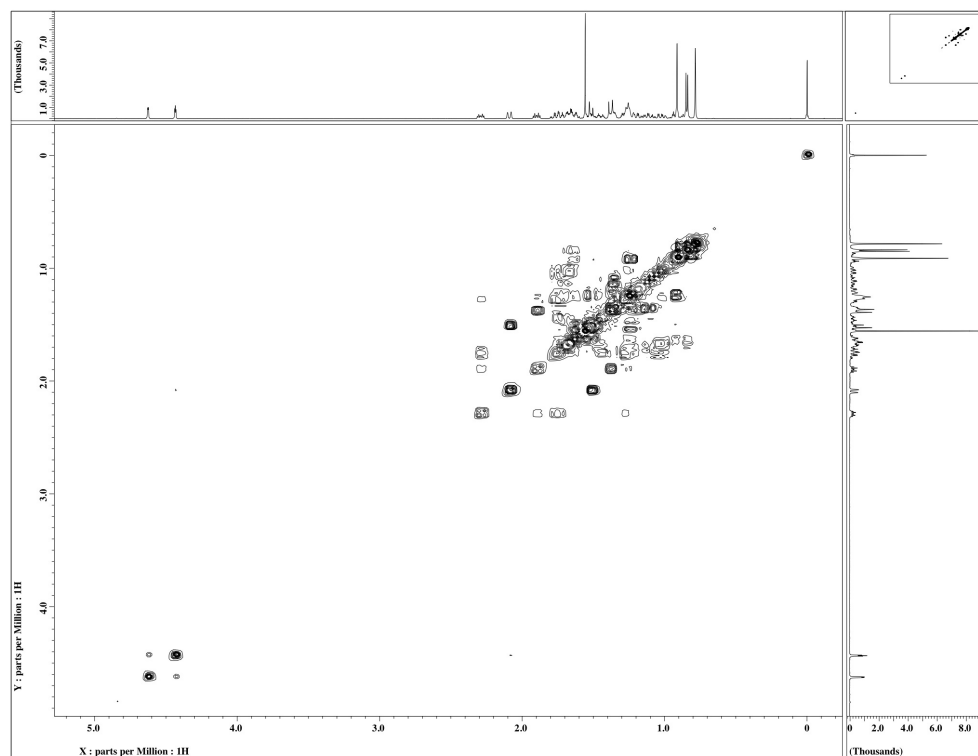

Figure S9.  $^1\text{H}$ - $^1\text{H}$  COSY of **1**

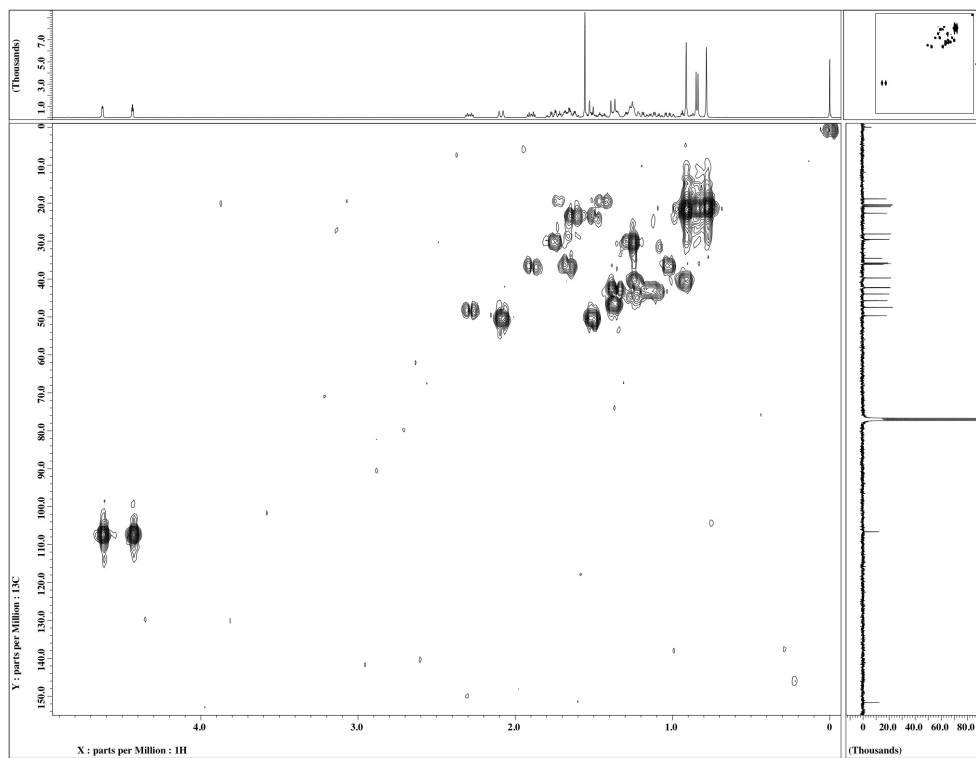

Figure S10.  $^1\text{H}$ - $^{13}\text{C}$  HMQC of 1.

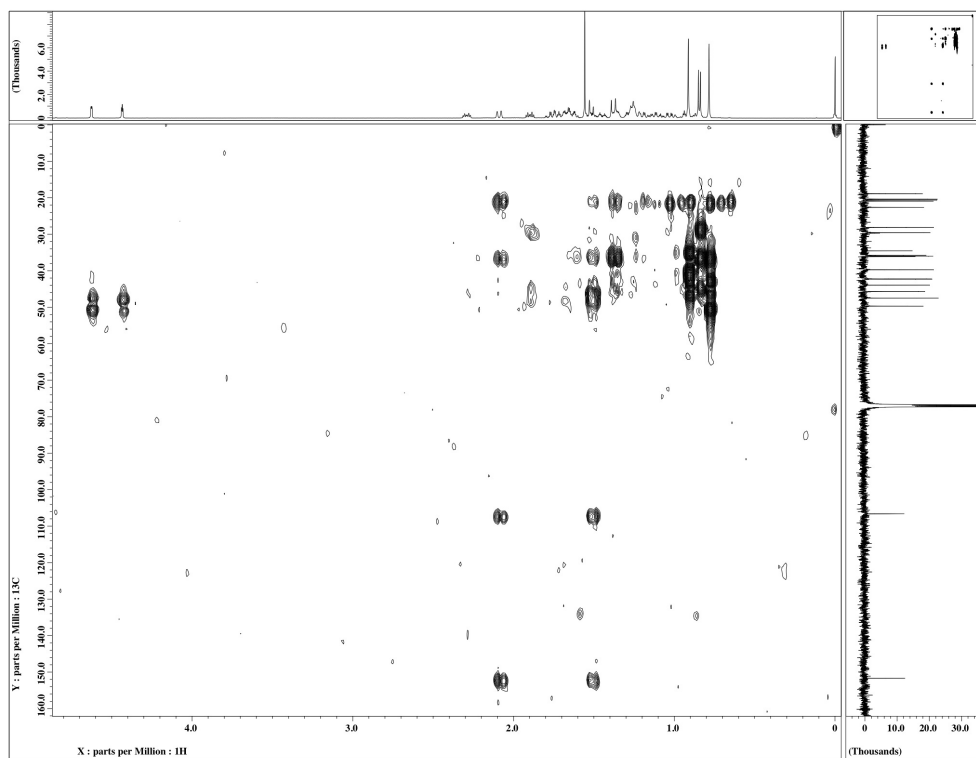

Figure S11.  $^1\text{H}$ - $^{13}\text{C}$  HMBC of 1.

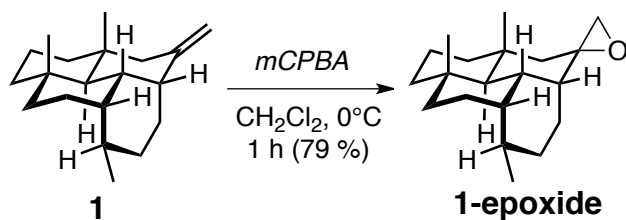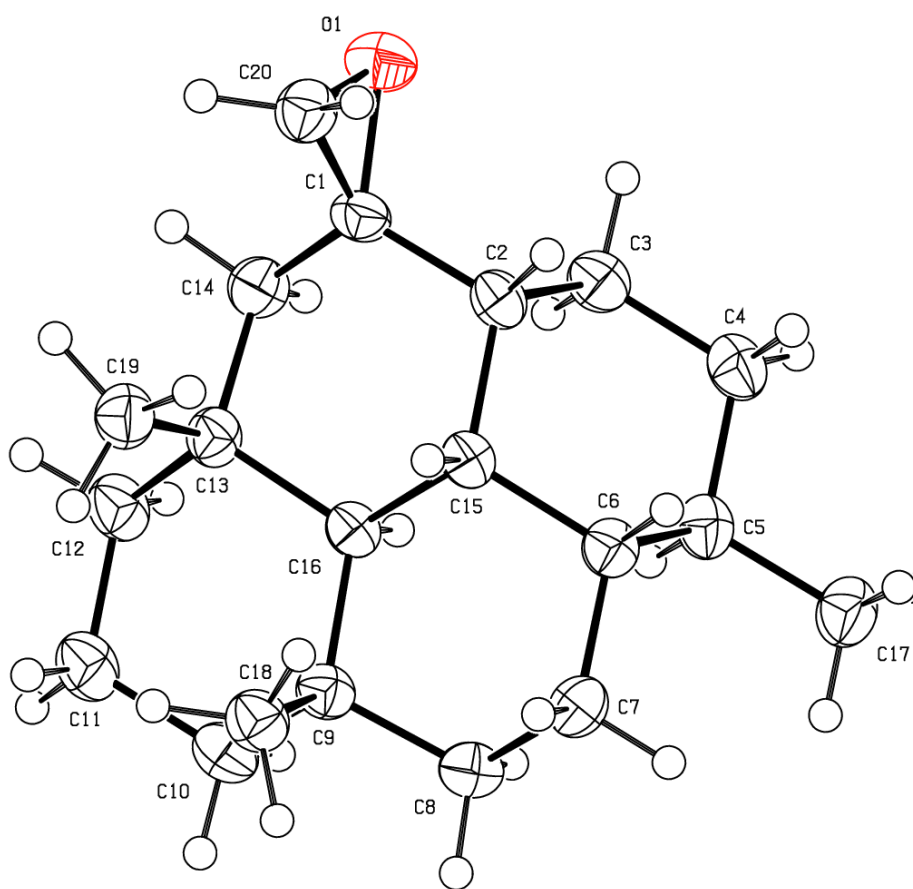

**Figure S12.** Crystal structure of **1-epoxide**.

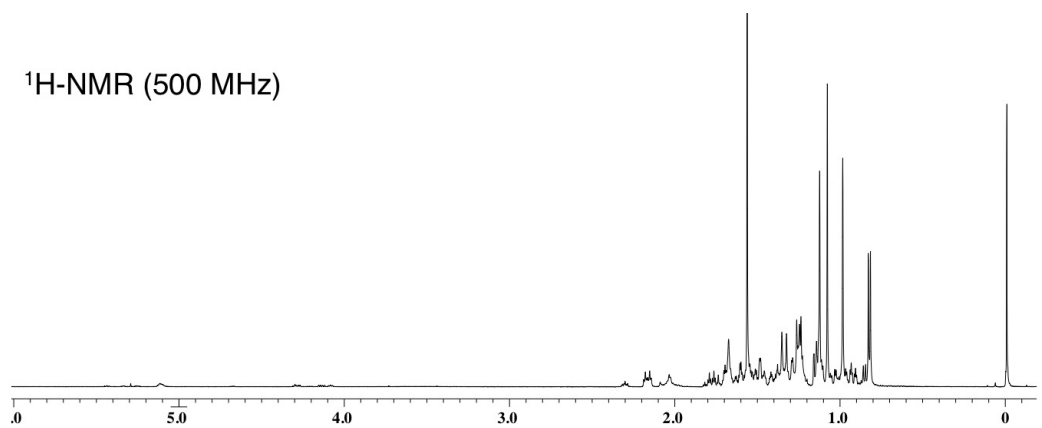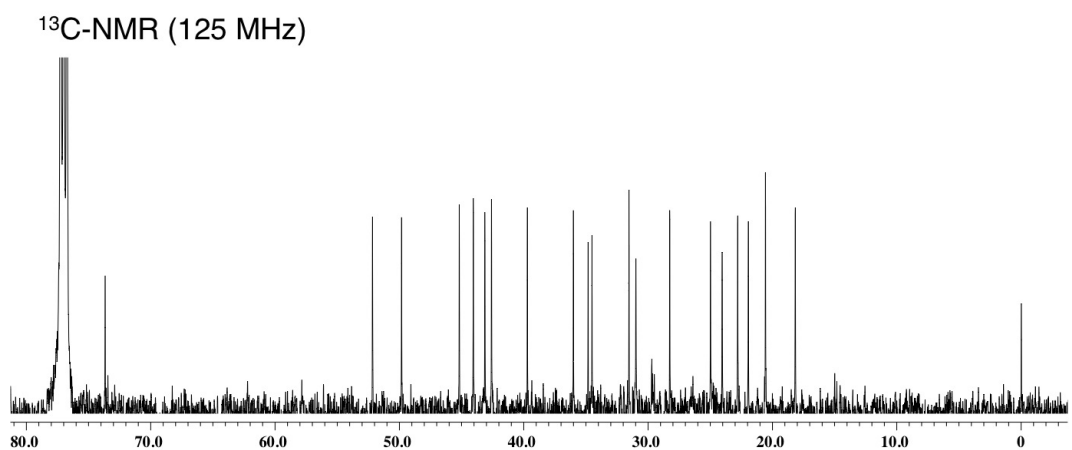

Figure S13.  $^1\text{H}$  (upper) and  $^{13}\text{C}$  (lower) NMR of hydropyrenol (**2**).

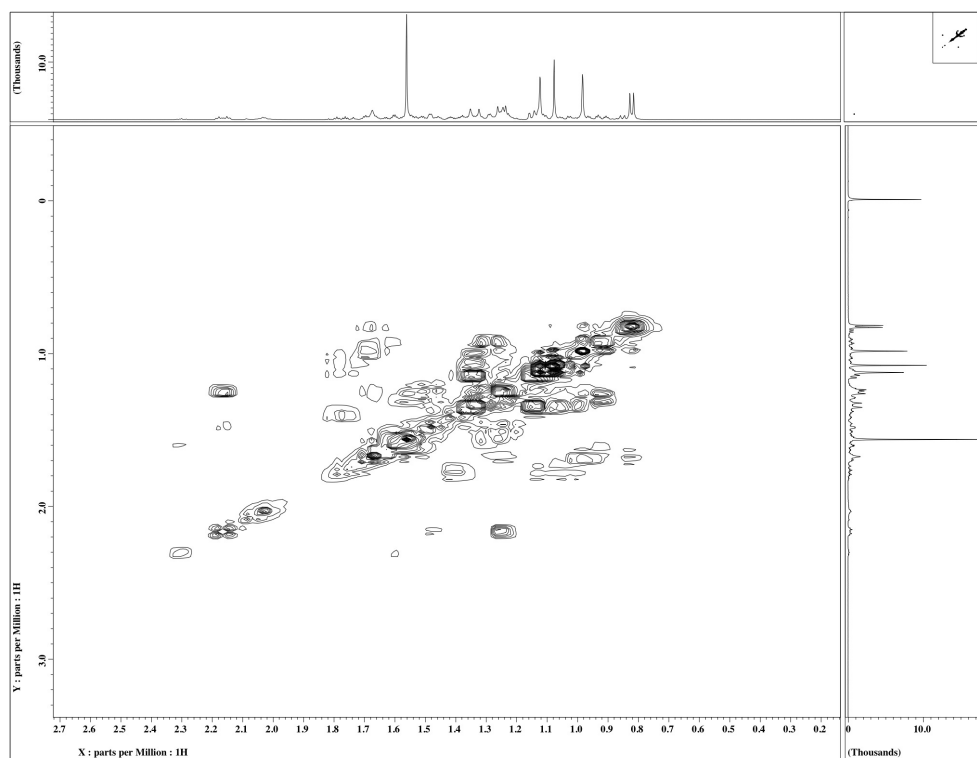

Figure S14.  $^1\text{H-}^1\text{H}$  COSY of **2**.

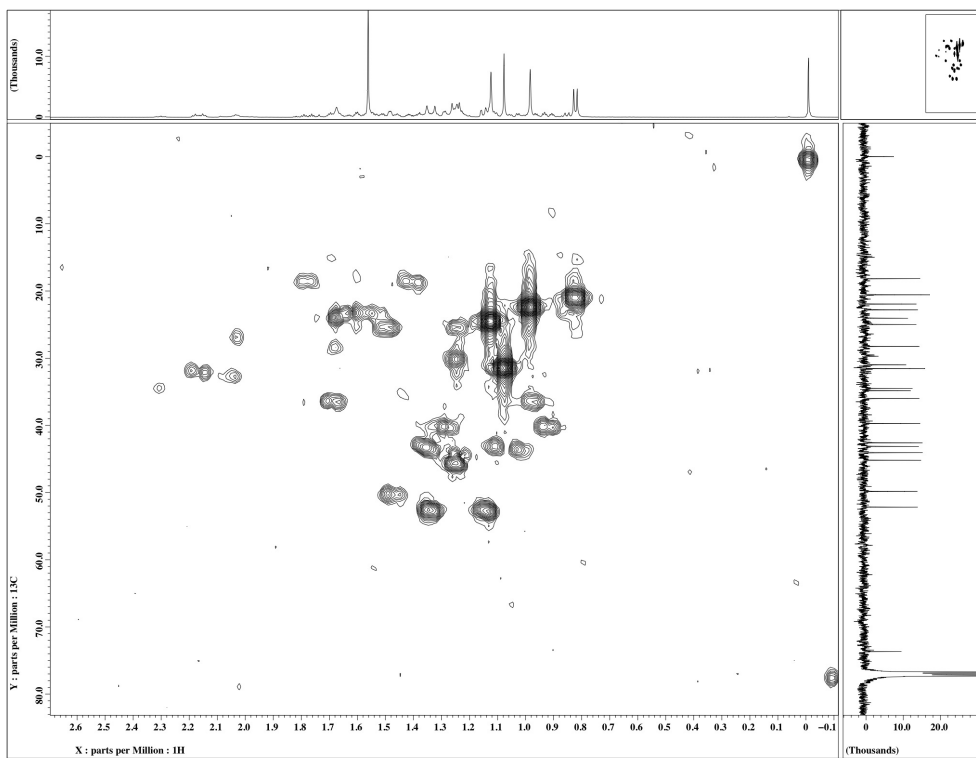

Figure S15.  $^1\text{H}$ - $^{13}\text{C}$  HMQC of 2.

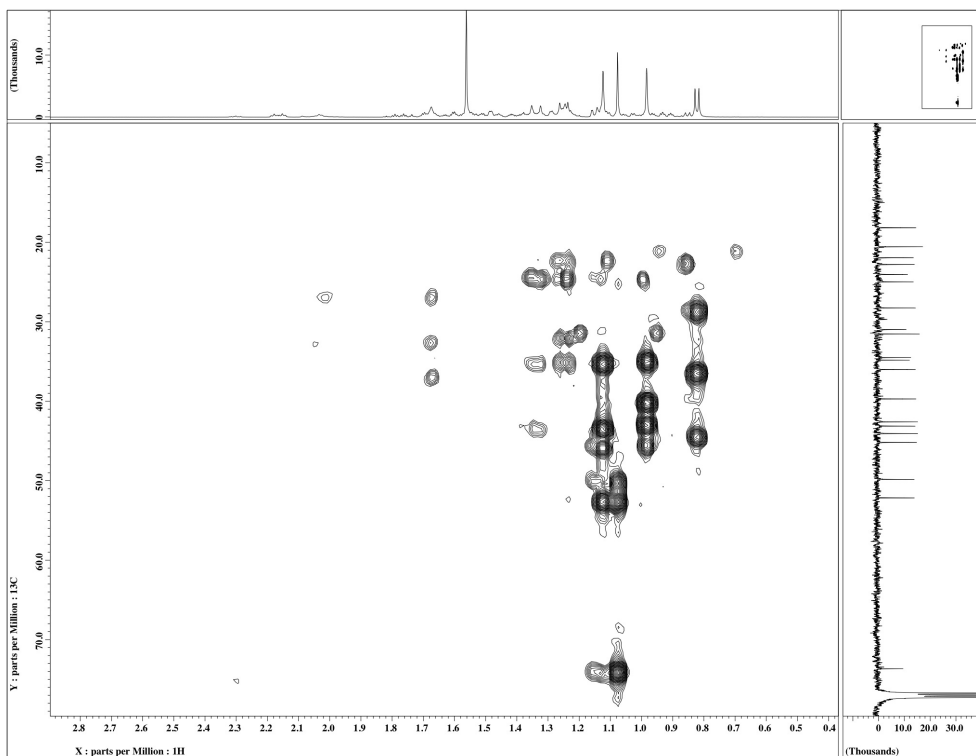

Figure S16.  $^1\text{H}$ - $^{13}\text{C}$  HMBC of 2.



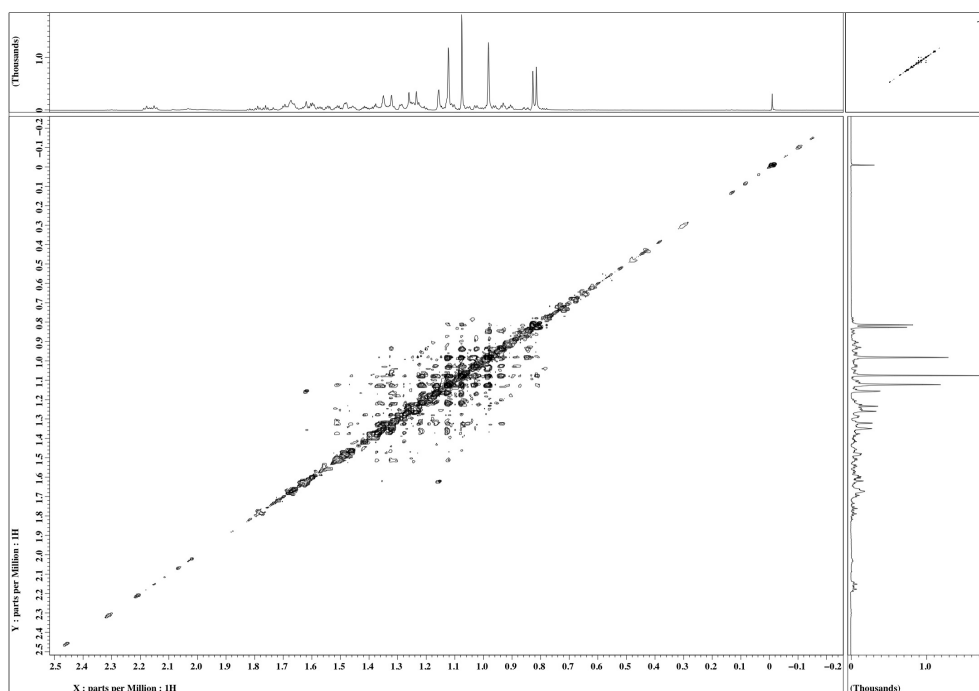

**Figure S17.**  $^1\text{H}$ - $^1\text{H}$  NOESY of **2**.

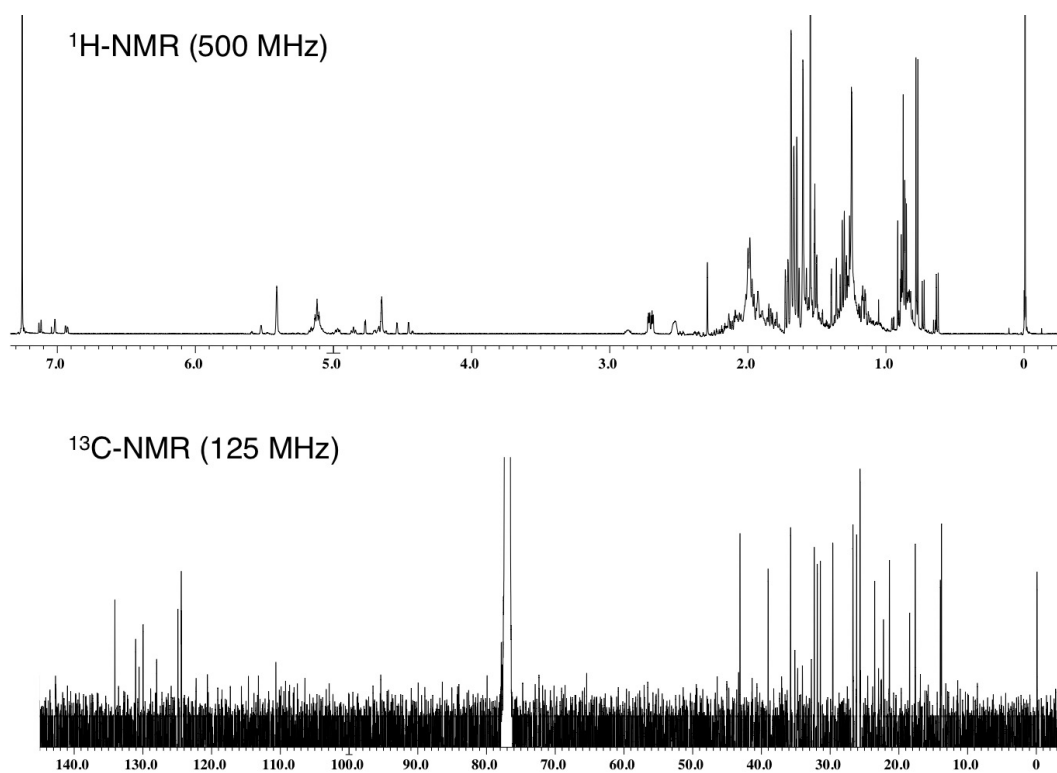

**Figure S18.**  $^1\text{H}$  (upper) and  $^{13}\text{C}$  (lower) NMR of isoelisabethatriene **B** (**3**).

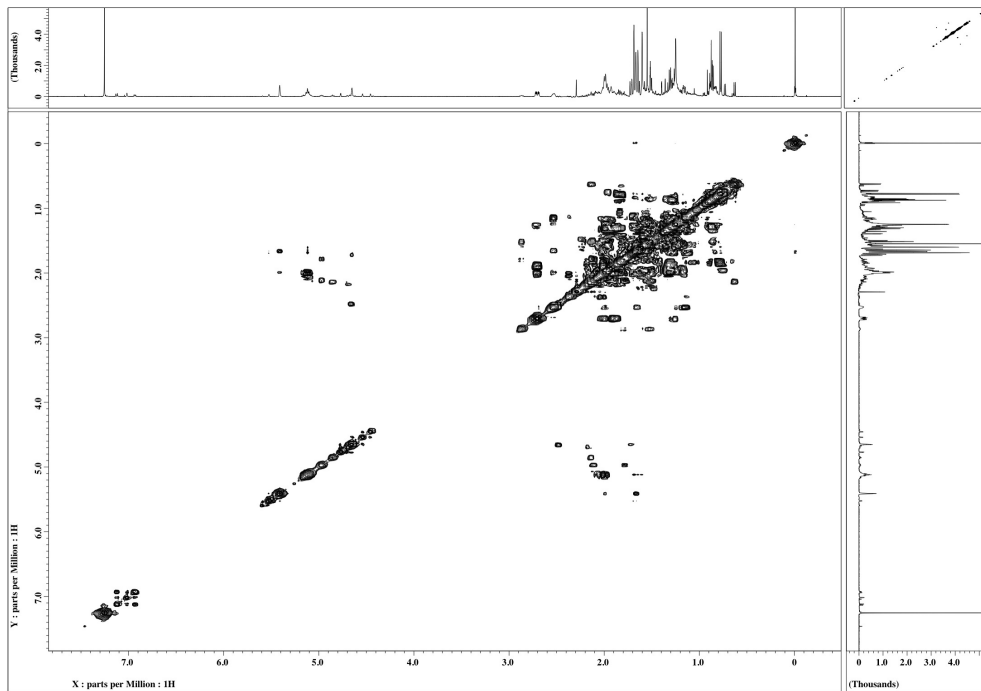

Figure S19.  $^1\text{H}$ - $^1\text{H}$  COSY of **3**.

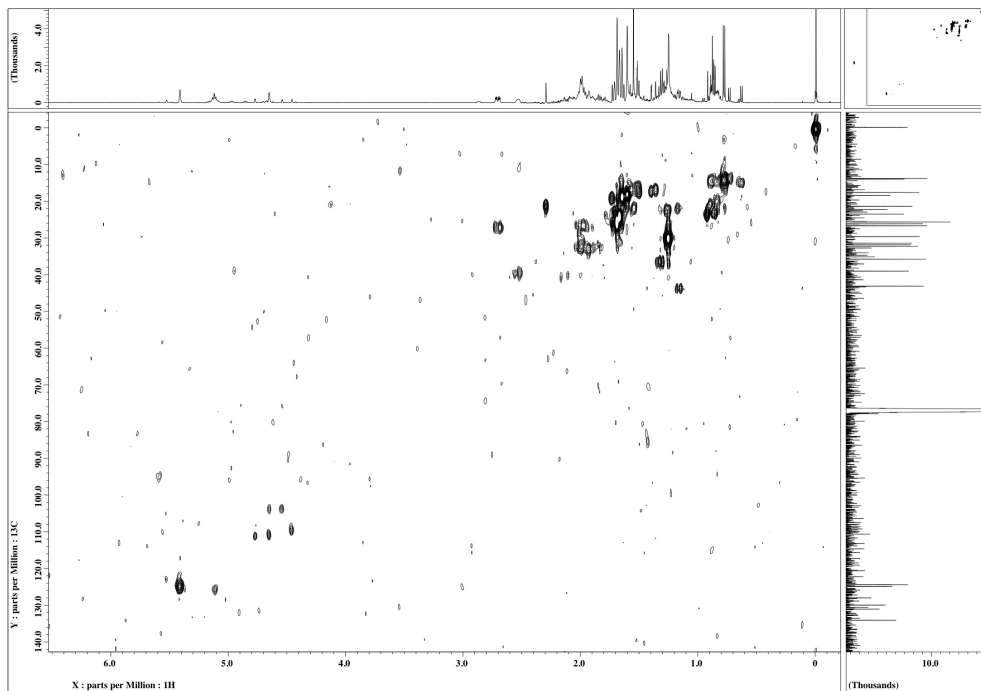

Figure S20.  $^1\text{H}$ - $^{13}\text{C}$  HMQC of **3**.

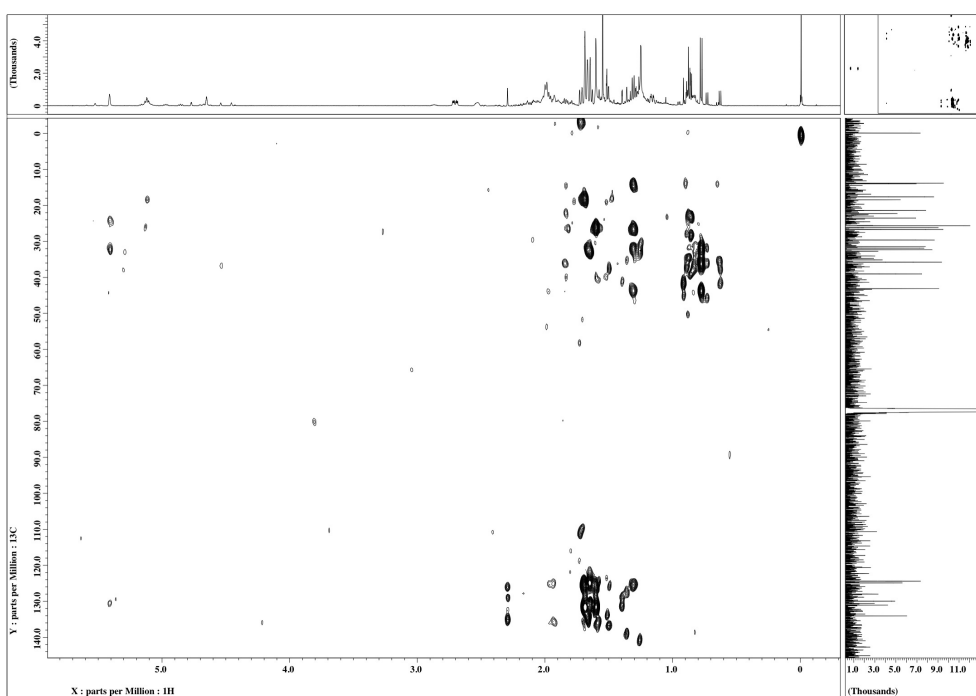

**Figure S21.**  $^1\text{H}$ - $^{13}\text{C}$  HMBC of **3**.

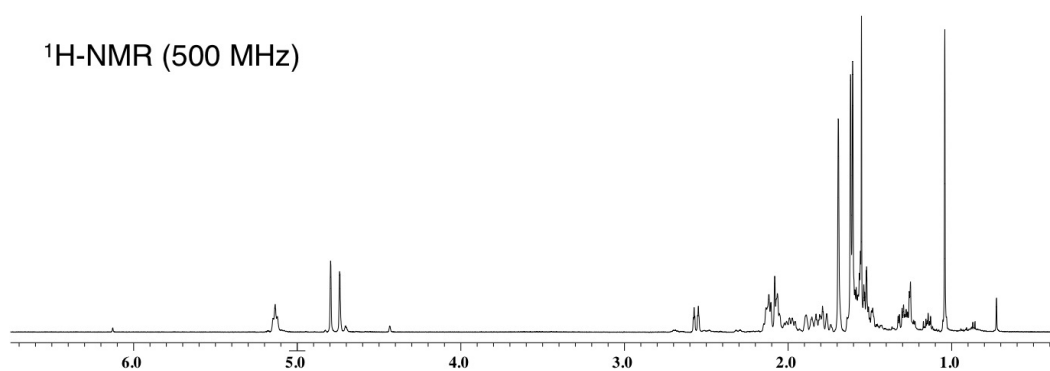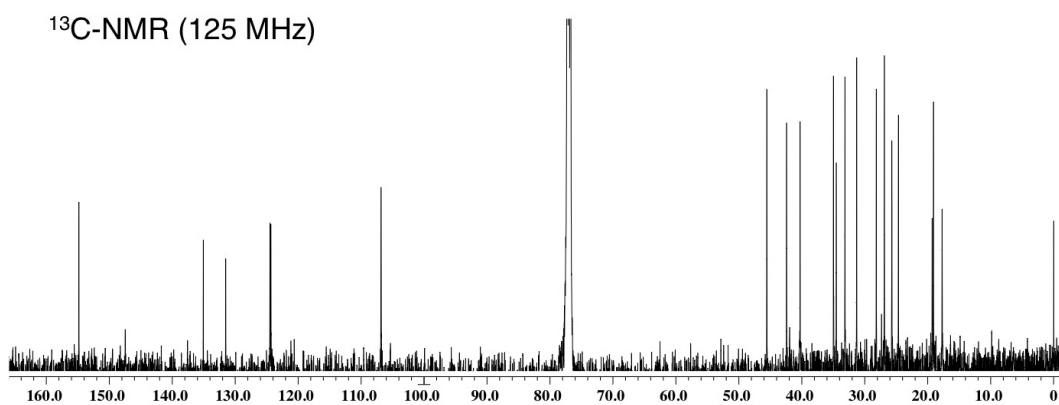

**Figure S22.**  $^1\text{H}$  (upper) and  $^{13}\text{C}$  (lower) NMR of clavulatriene A (**4**).

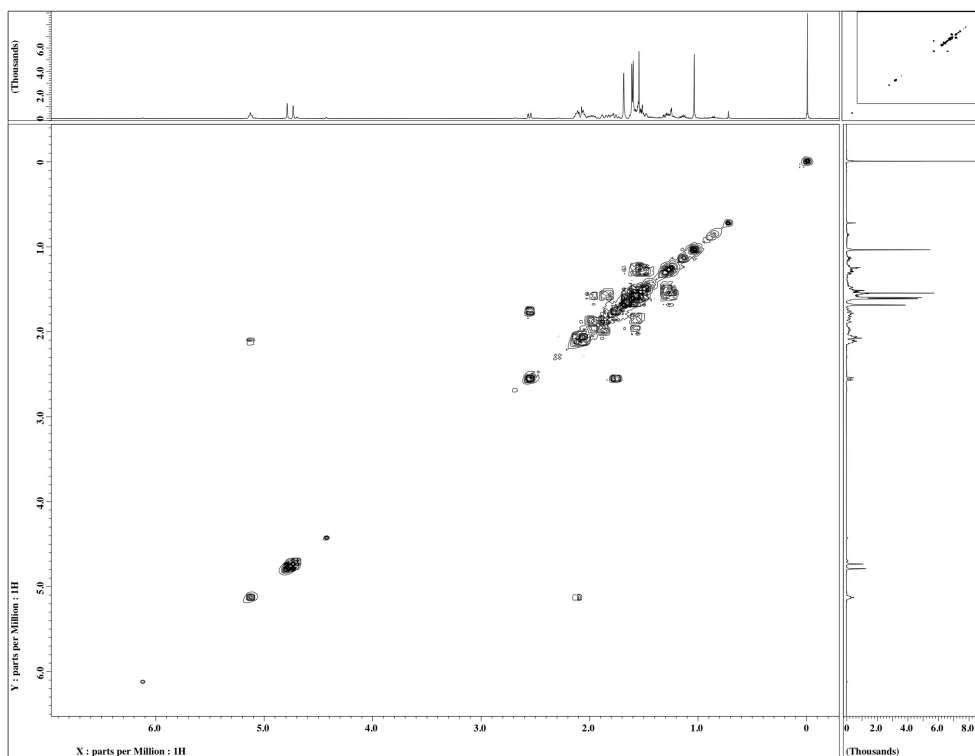

Figure S23.  $^1\text{H}$ - $^1\text{H}$  COSY of **4**.

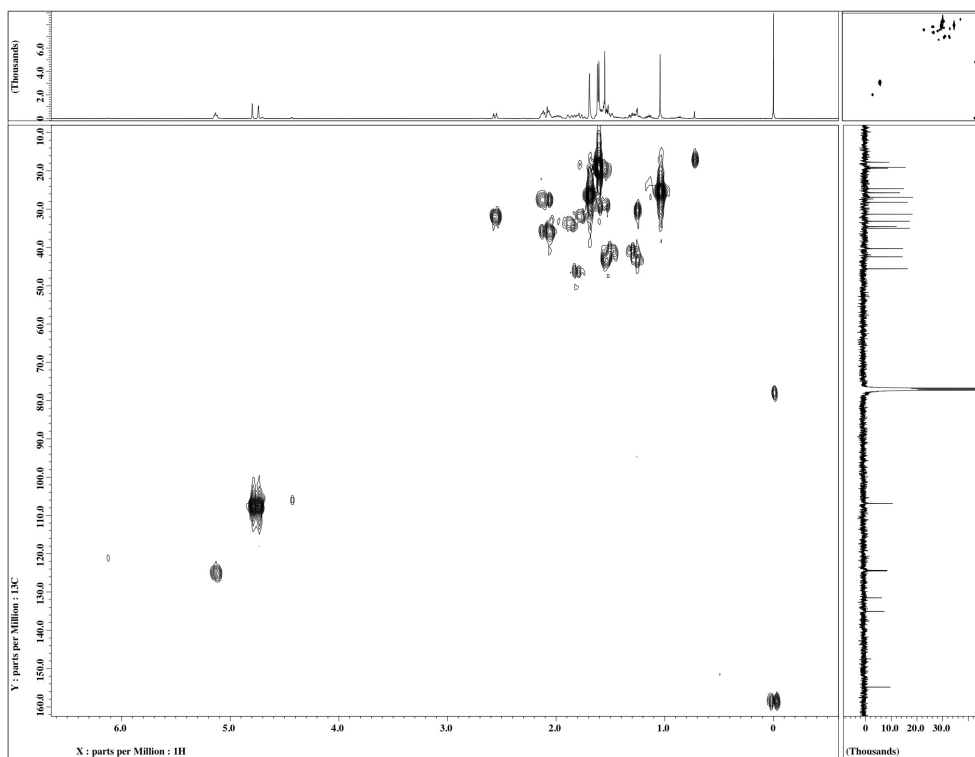

Figure S24.  $^1\text{H}$ - $^{13}\text{C}$  HMQC of **4**.

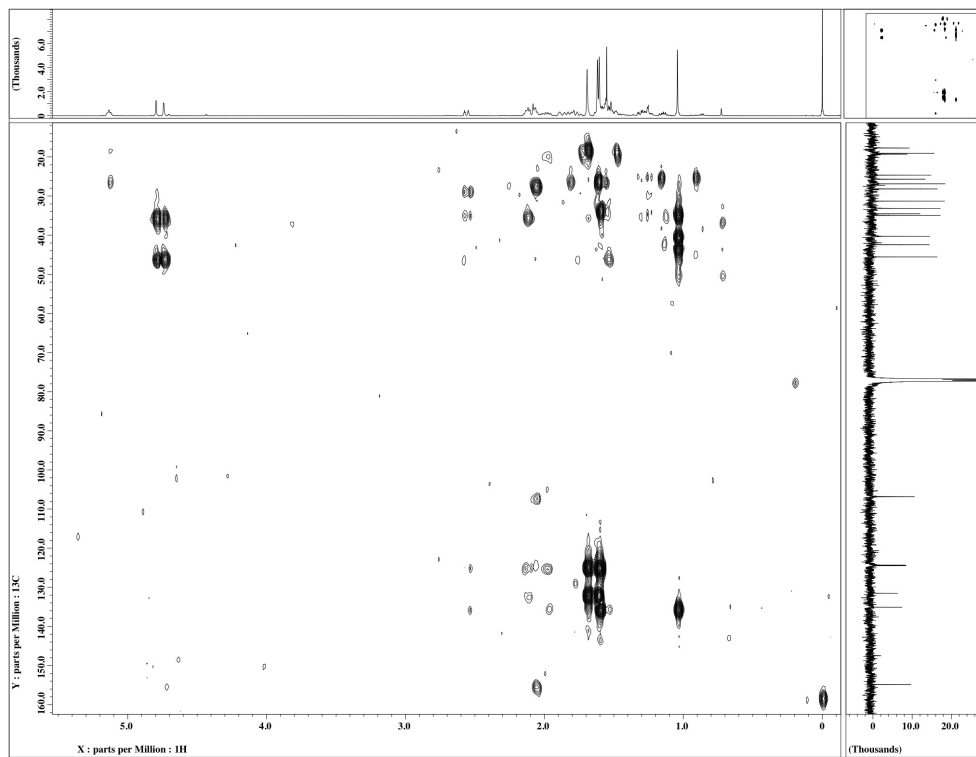

**Figure S25.**  $^1\text{H}$ - $^{13}\text{C}$  HMBC of **4**.

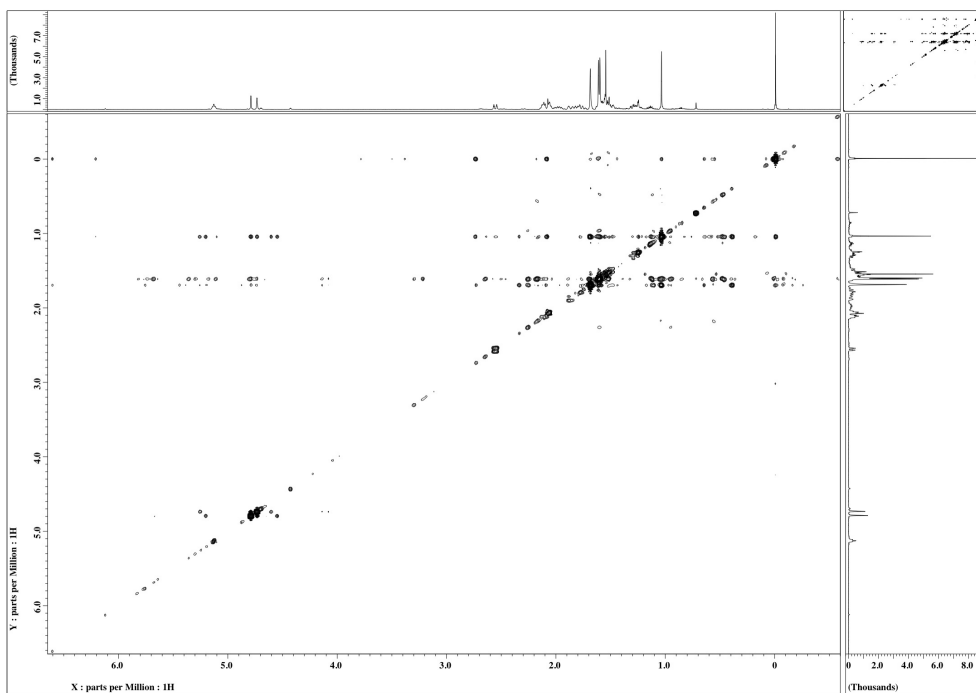

**Figure S26.**  $^1\text{H}$ - $^1\text{H}$  NOESY of **4**.

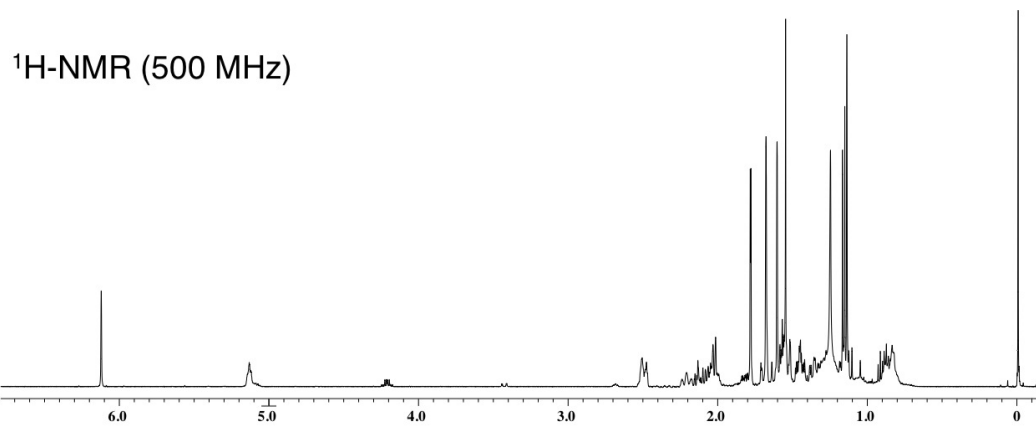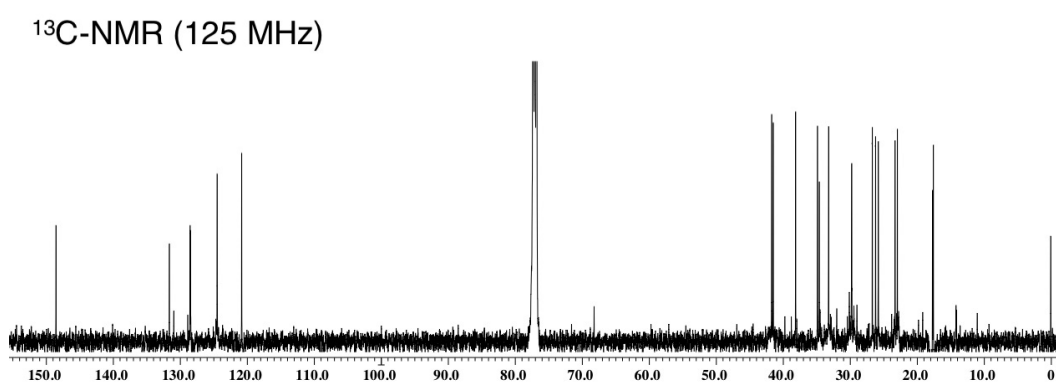

Figure S27.  $^1\text{H}$  (upper) and  $^{13}\text{C}$  (lower) NMR of clavulatriene B (**5**).

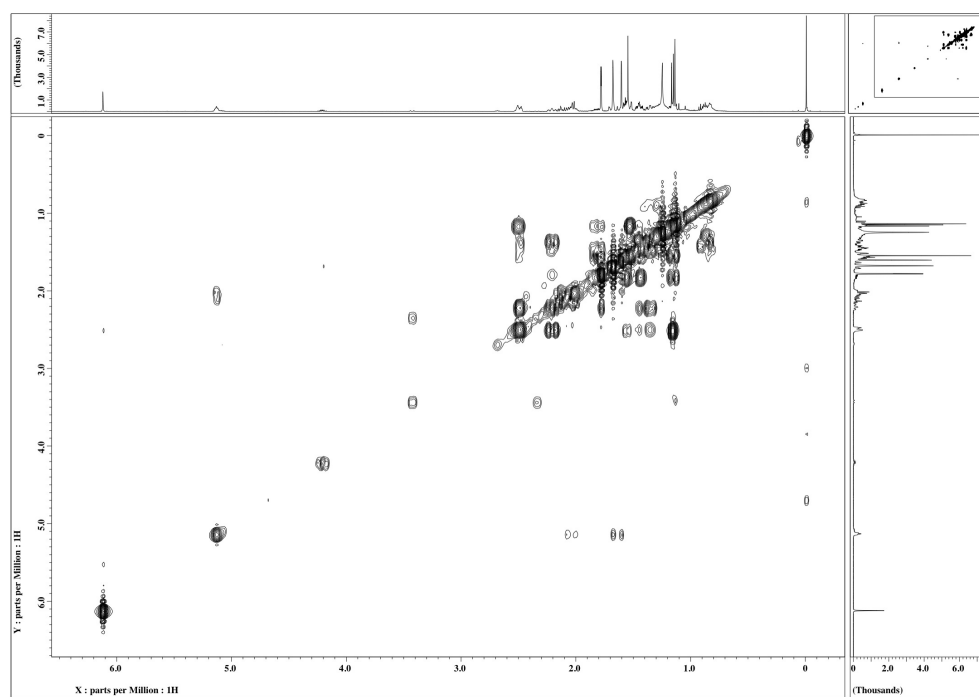

Figure S28.  $^1\text{H}$ - $^1\text{H}$  COSY of **5**.

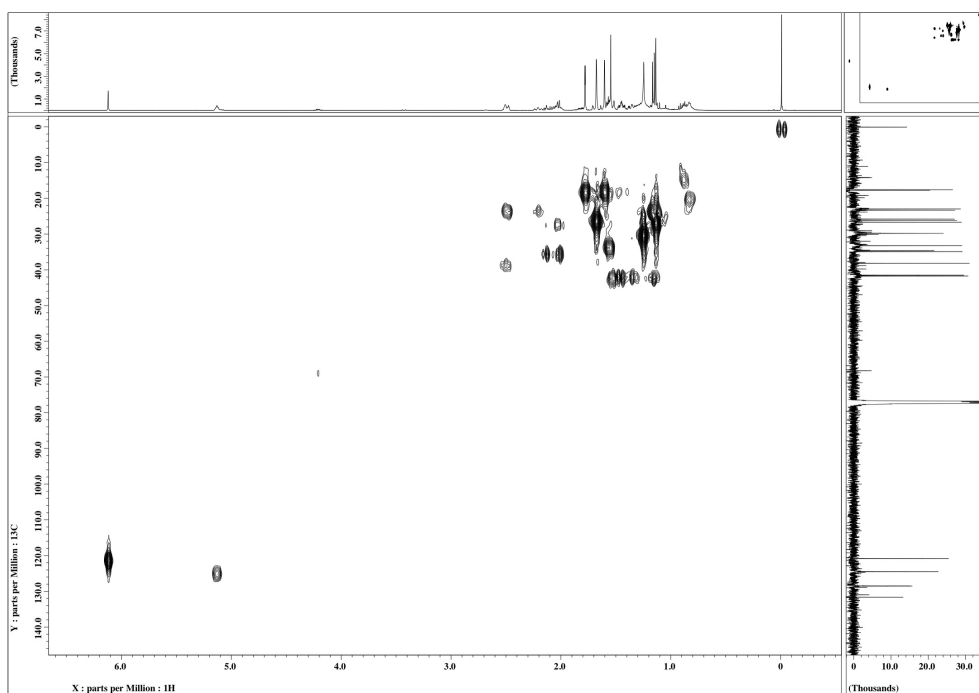

Figure S29.  $^1\text{H}$ - $^{13}\text{C}$  HMQC of 5.

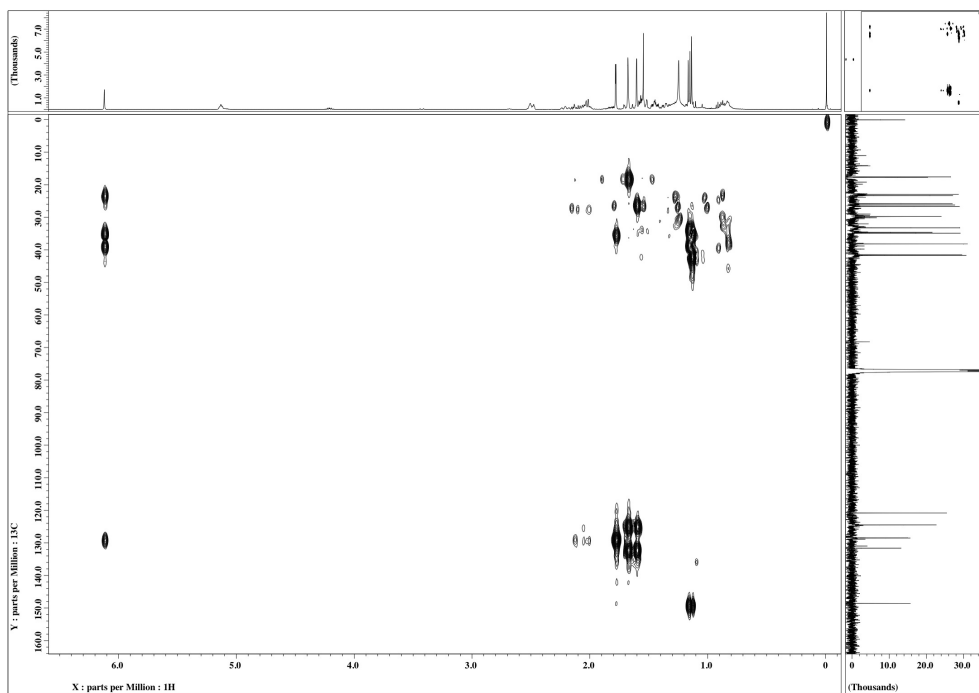

Figure S30.  $^1\text{H}$ - $^{13}\text{C}$  HMBC of 5.

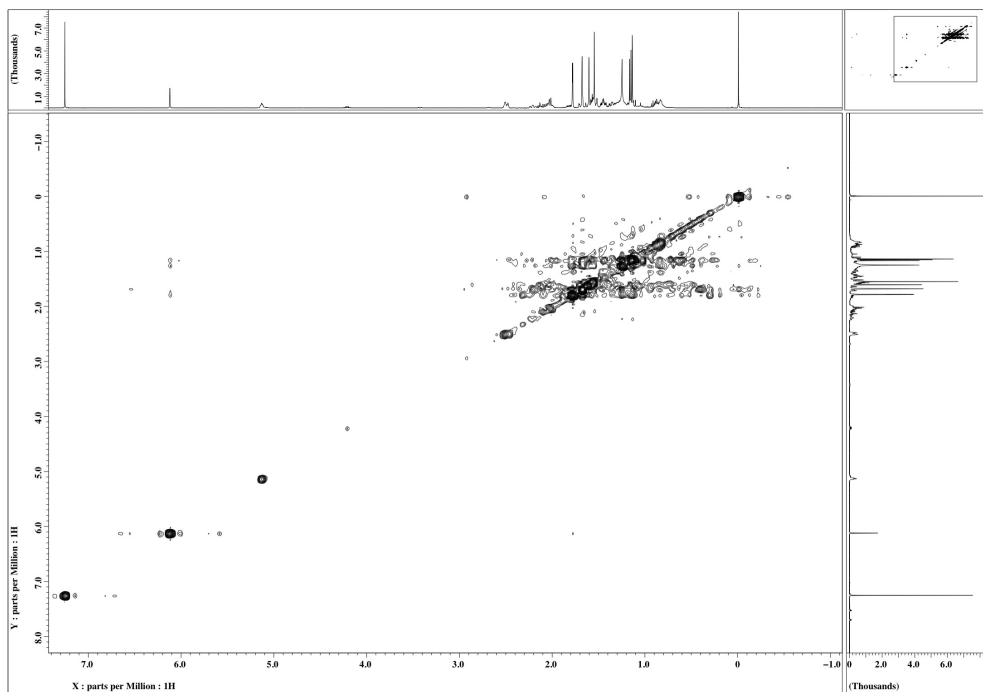

**Figure S31.**  $^1\text{H}$ - $^1\text{H}$  NOESY of **5**.

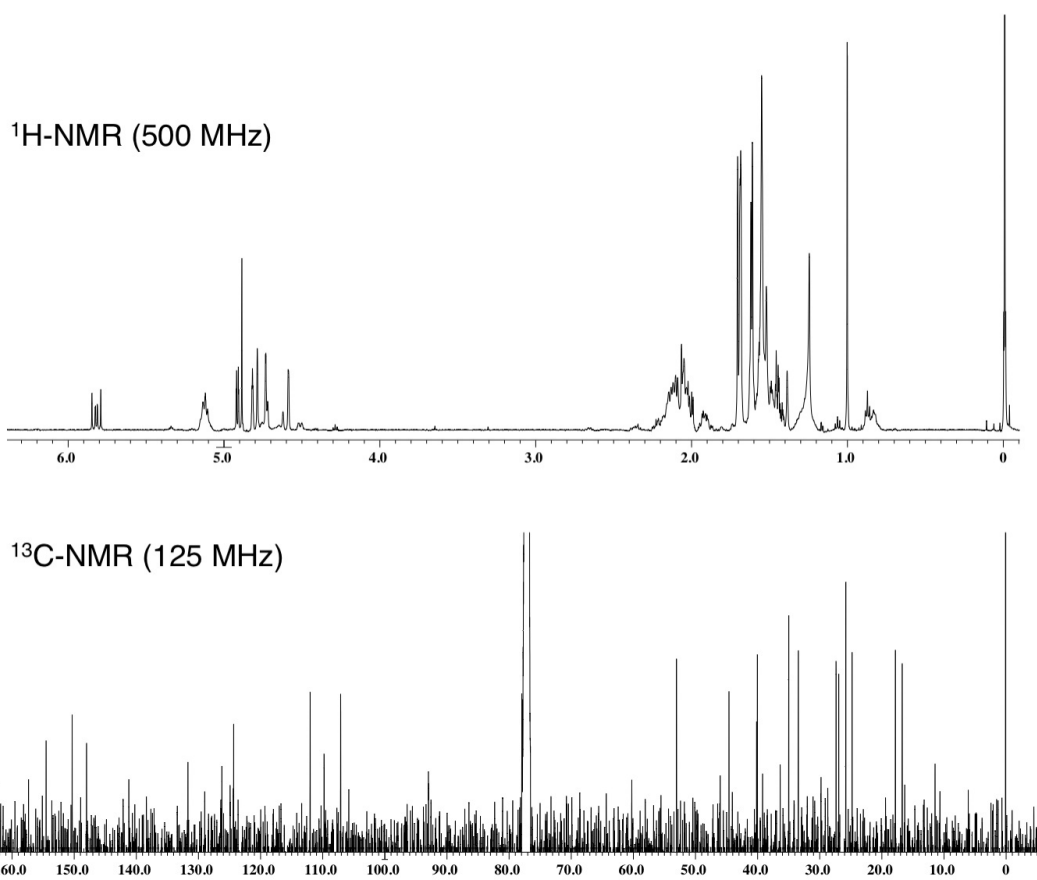

**Figure S32.**  $^1\text{H}$  (upper) and  $^{13}\text{C}$  (lower) NMR of prenyl- $\beta$ -elemene (**6**).



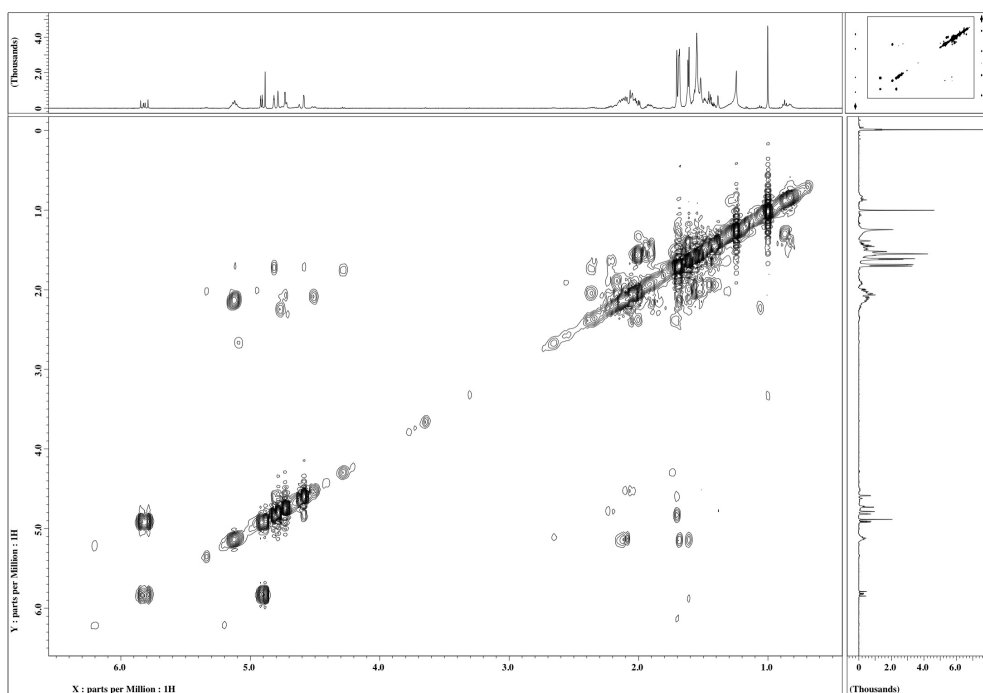

Figure S33.  $^1\text{H}$ - $^1\text{H}$  COSY of **6**.

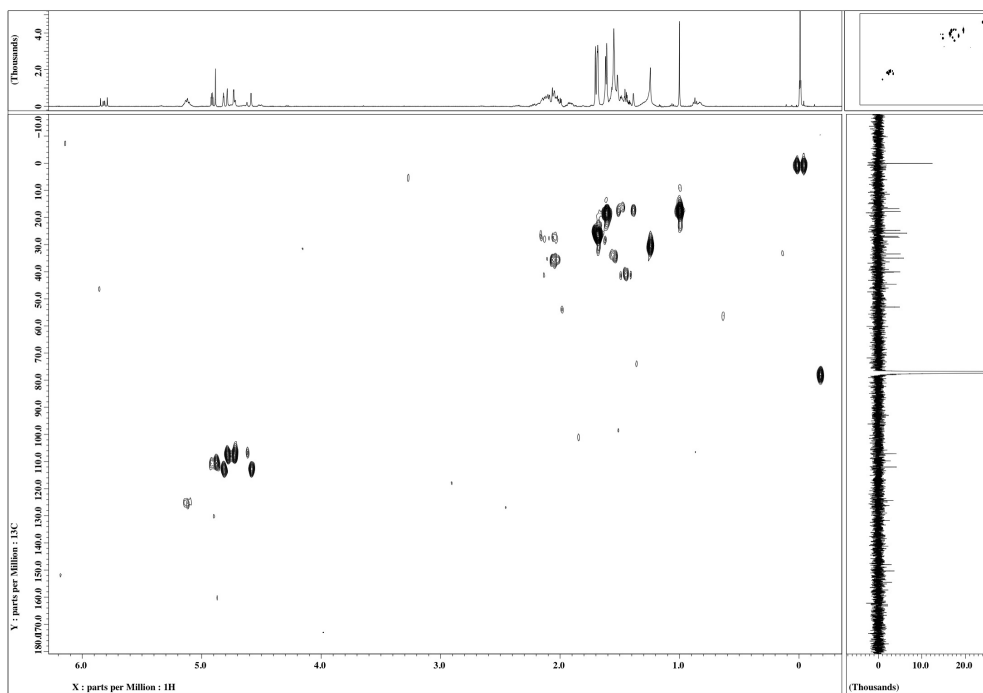

Figure S34.  $^1\text{H}$ - $^{13}\text{C}$  HMQC of **6**.

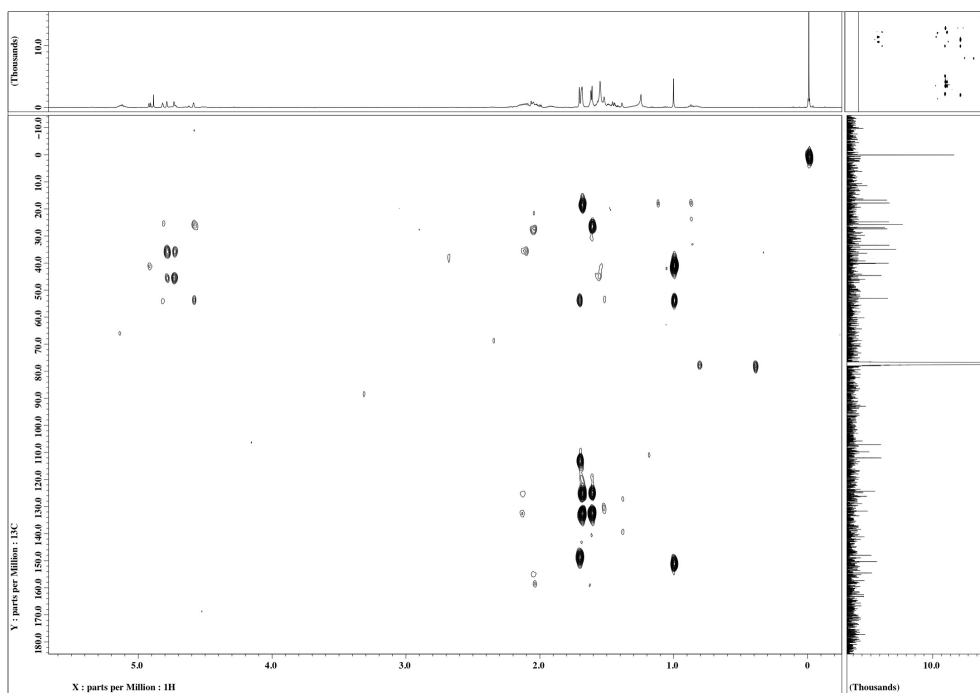

Figure S35.  $^1\text{H}$ - $^{13}\text{C}$  HMBC of 6.

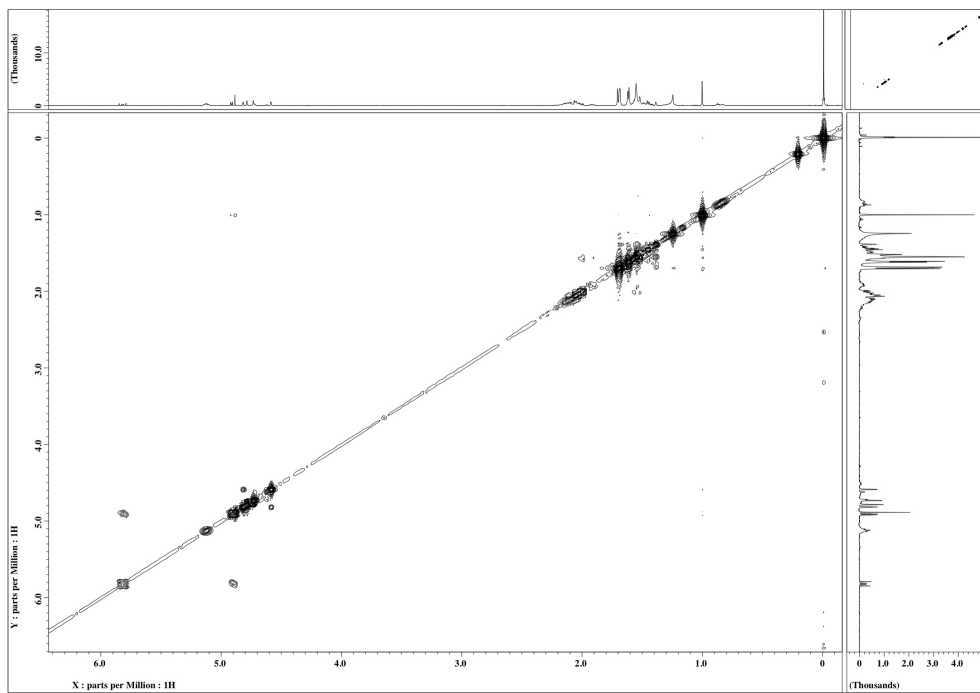

Figure S36.  $^1\text{H}$ - $^1\text{H}$  NOESY of 6.

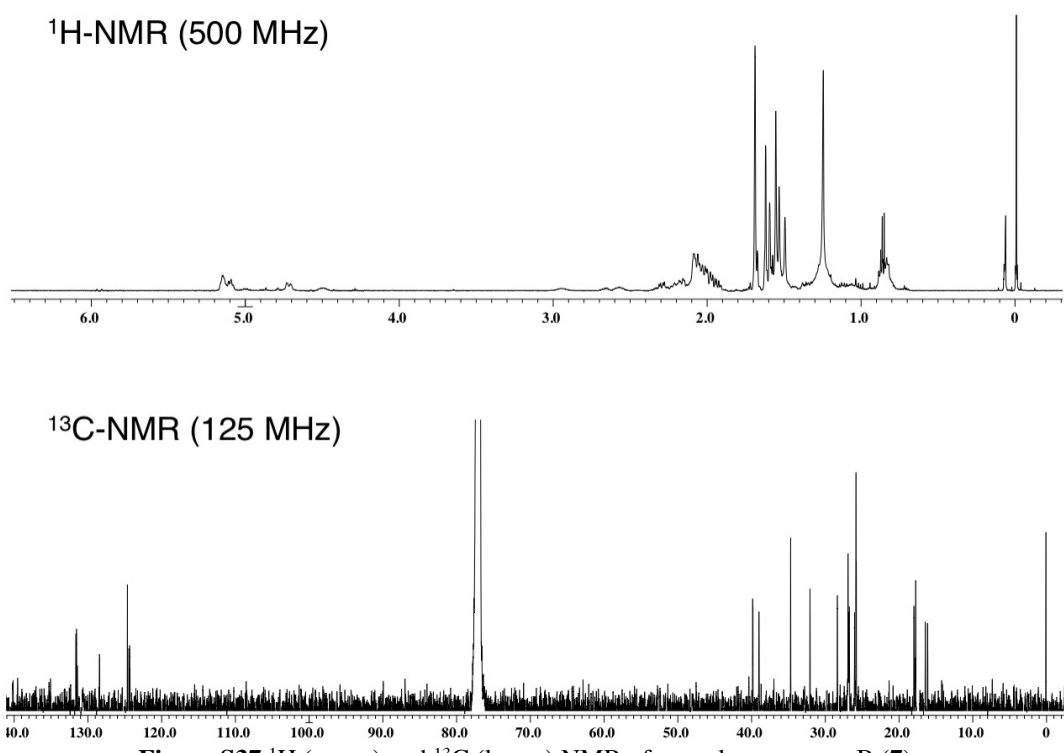

Figure S37  $^1\text{H}$  (upper) and  $^{13}\text{C}$  (lower) NMR of prenylgermacrene B (7).

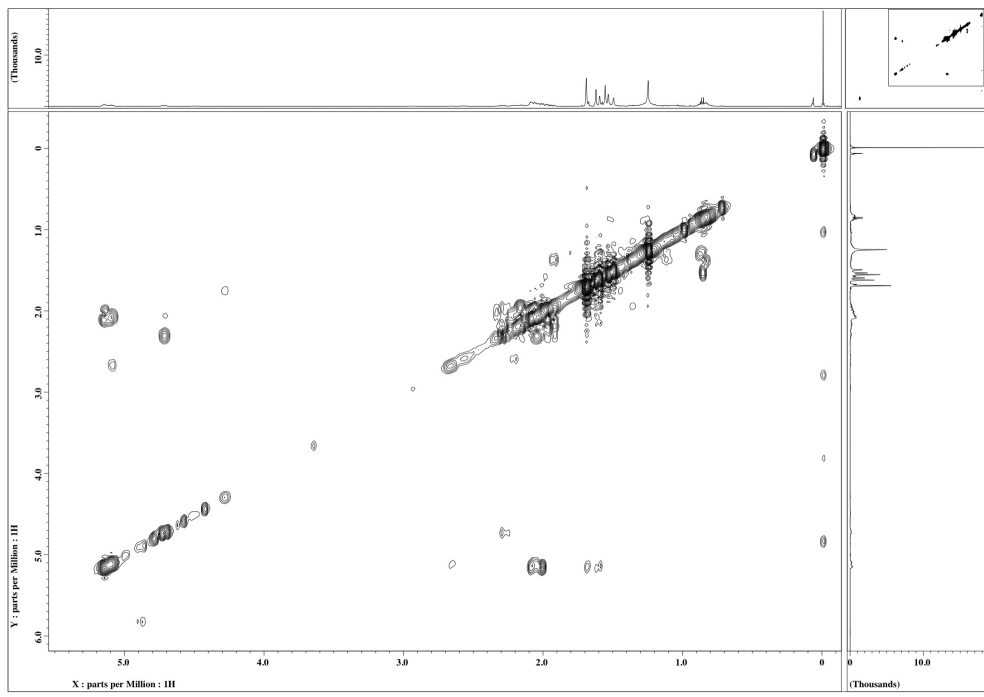

Figure S38.  $^1\text{H-}^1\text{H}$  COSY of 7.

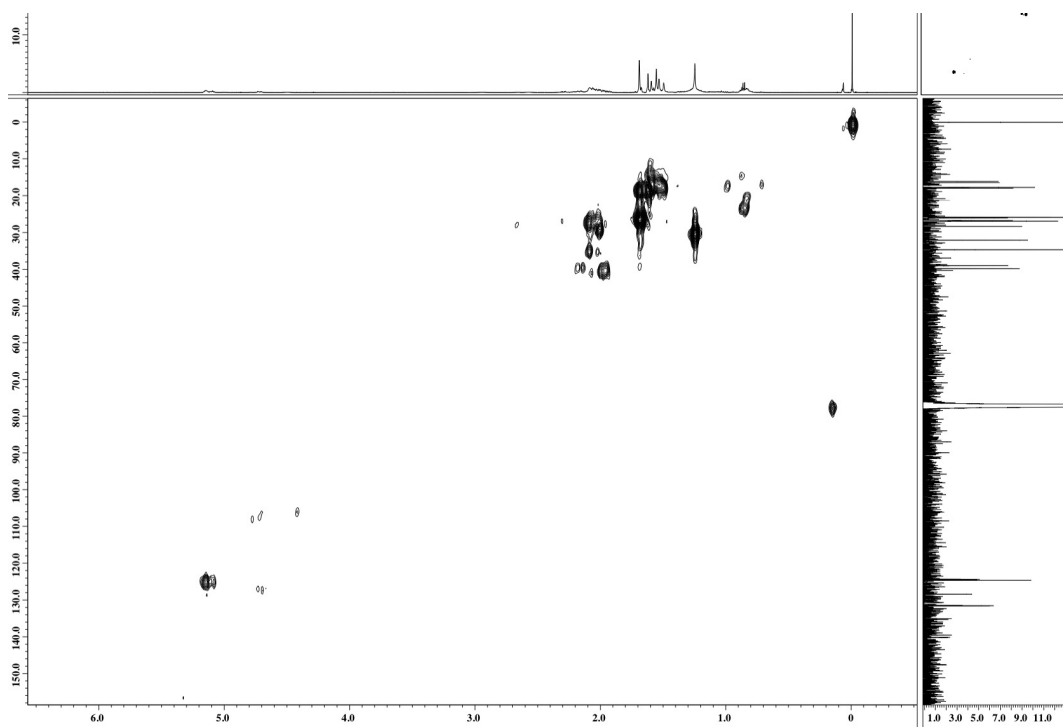

Figure S39.  $^1\text{H}$ - $^{13}\text{C}$  HMQC of 7.

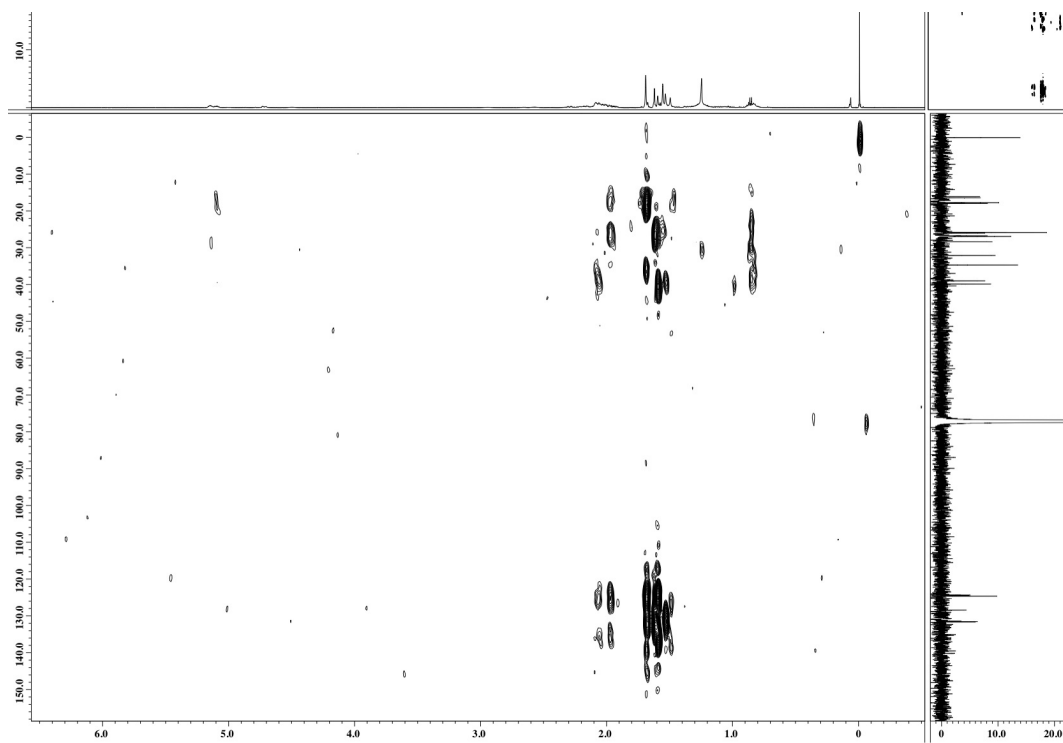

Figure S40.  $^1\text{H}$ - $^{13}\text{C}$  HMBC of 7.

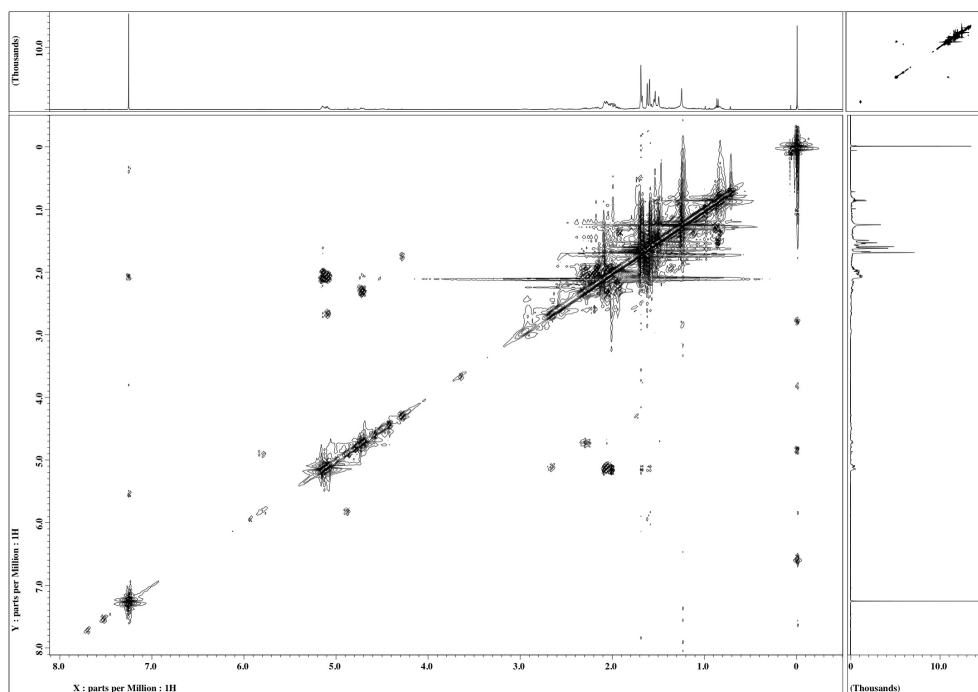

Figure S41.  $^1\text{H}$ - $^1\text{H}$  ROESY of **7**.

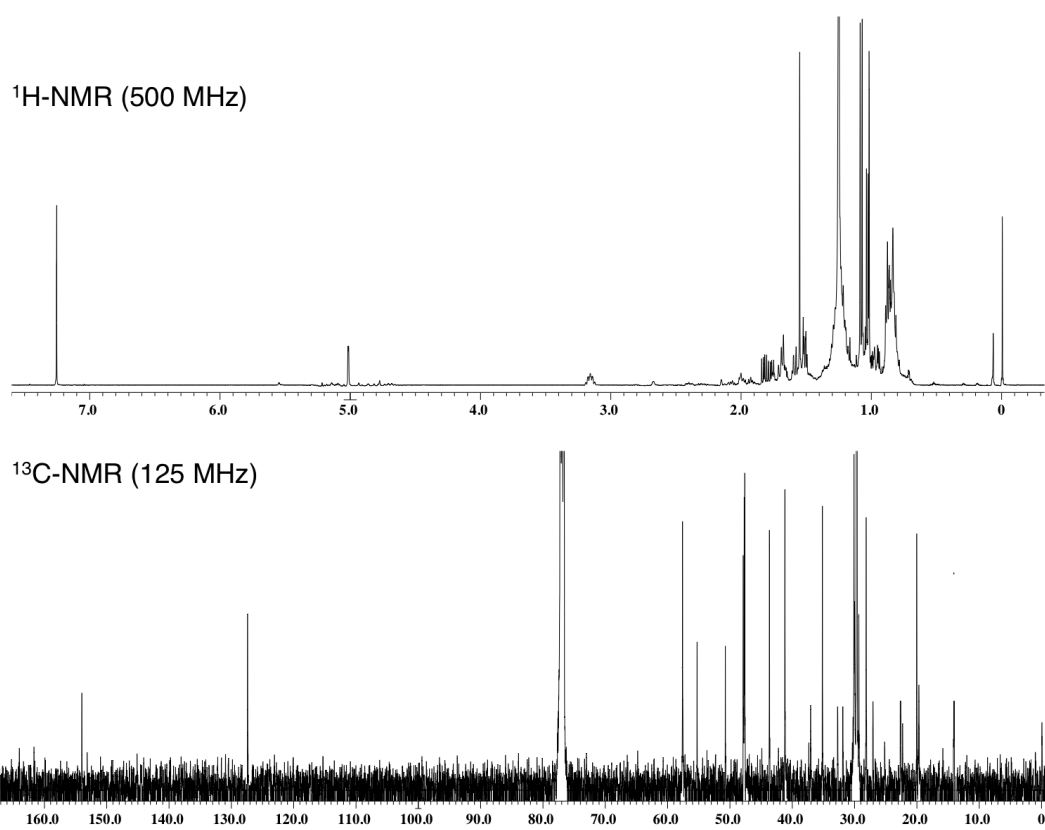

Figure S42.  $^1\text{H}$  (upper) and  $^{13}\text{C}$  (lower) NMR of isohirsut-1-ene (**8**).

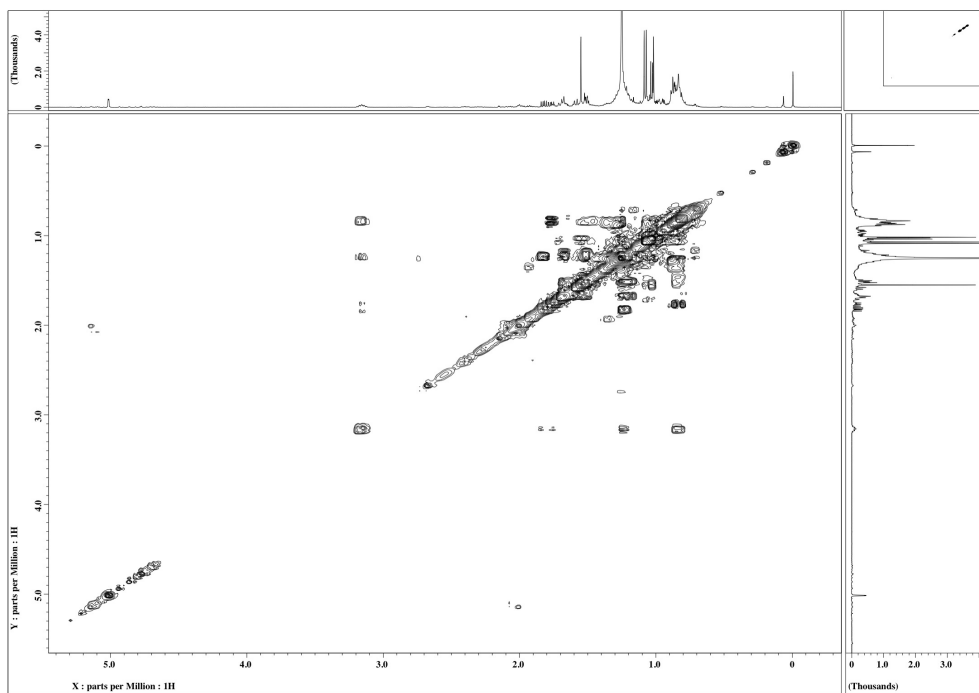

**Figure S43.**  $^1\text{H}$ - $^1\text{H}$  COSY of **8**.

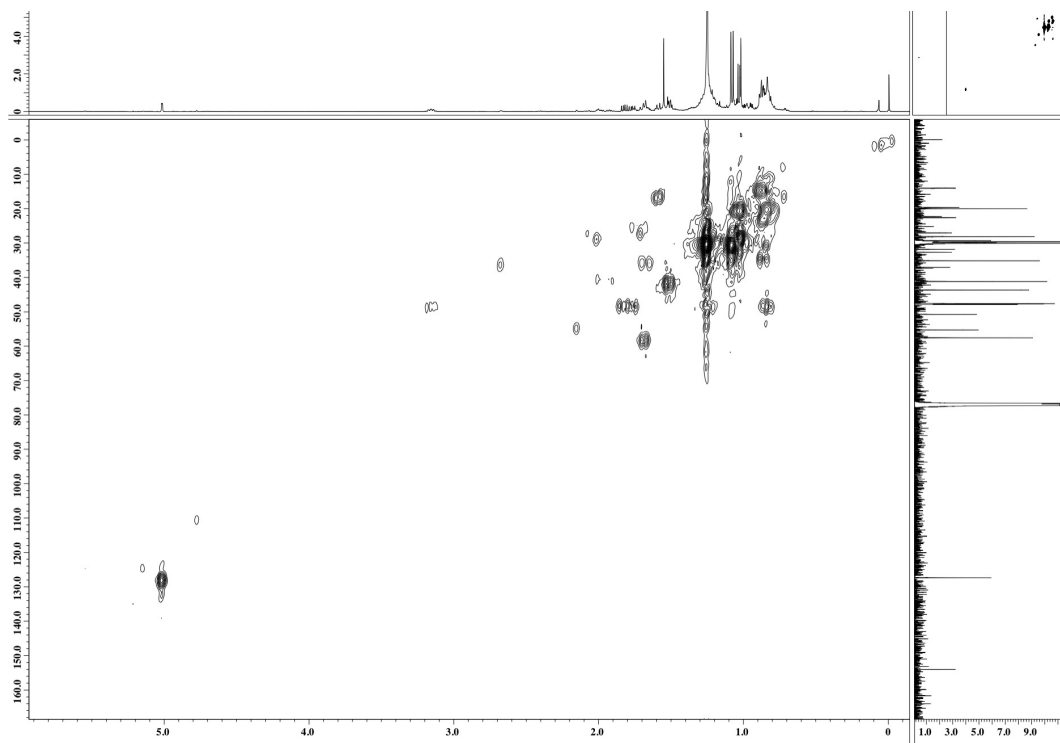

**Figure S44.**  $^1\text{H}$ - $^{13}\text{C}$  HMQC of **8**.

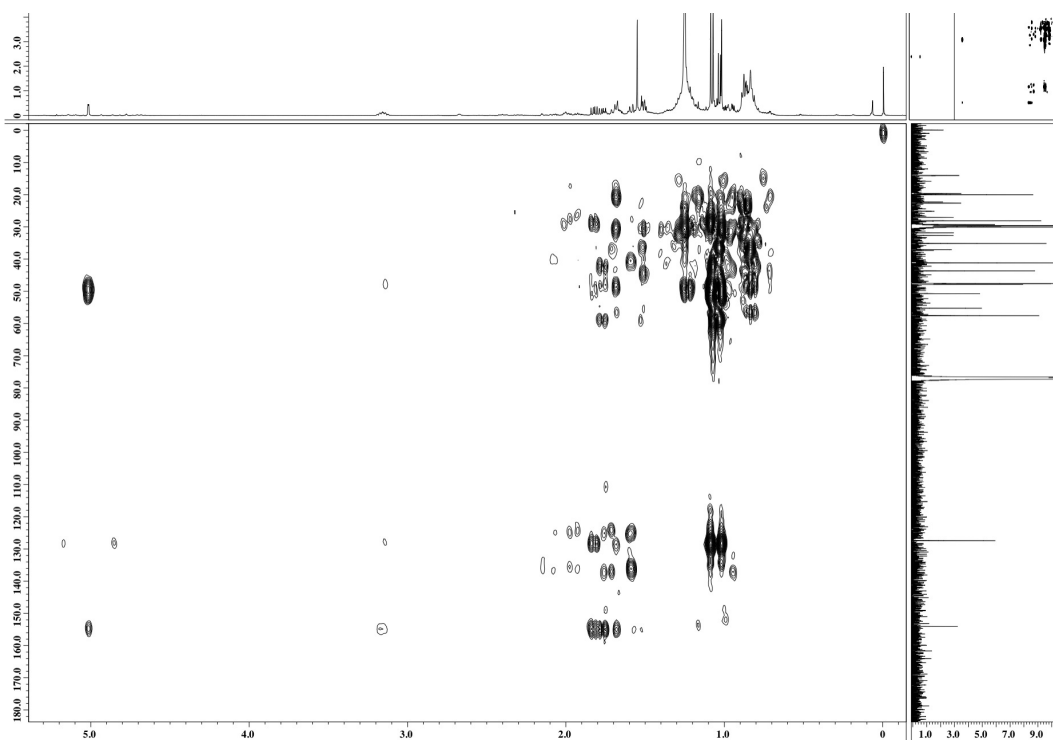

Figure S45.  $^1\text{H}$ - $^{13}\text{C}$  HMBC of **8**.

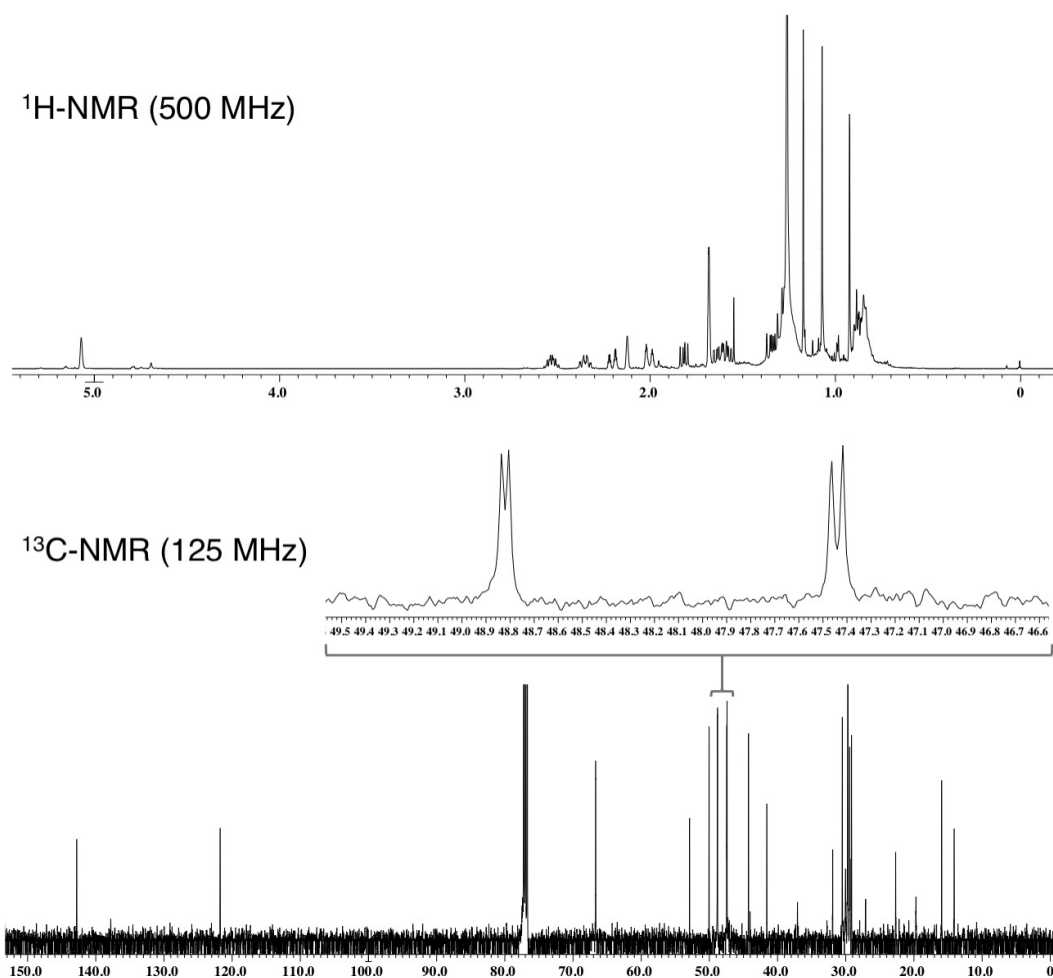

Figure S46.  $^1\text{H}$  (upper) and  $^{13}\text{C}$  (lower) NMR of isohirsut-4-ene (**9**).

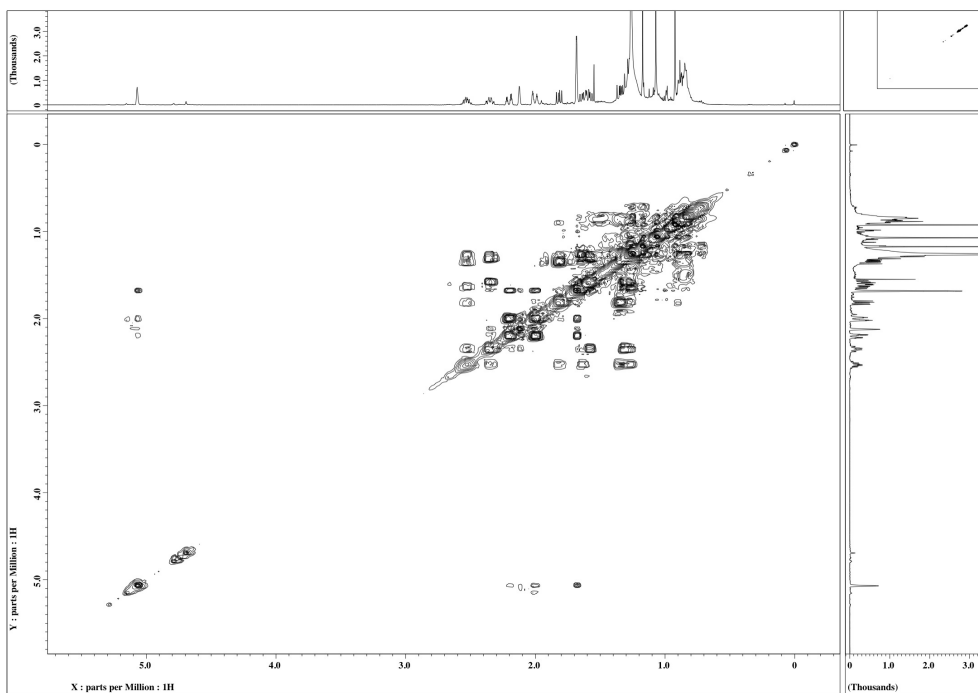

**Figure S47.**  $^1\text{H}$ - $^1\text{H}$  COSY of **9**.

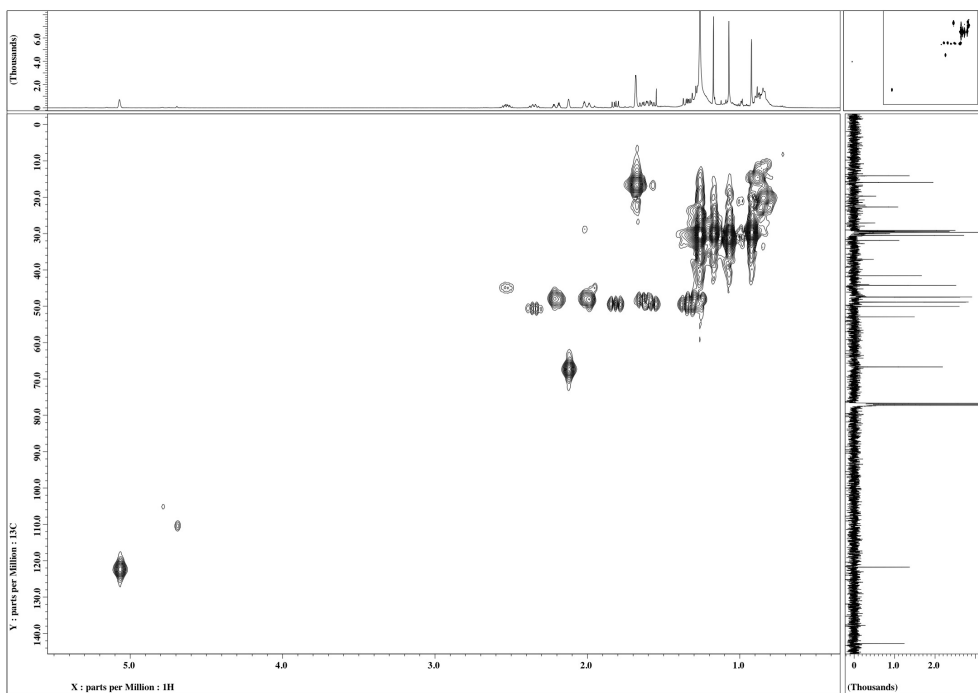

**Figure S48.**  $^1\text{H}$ - $^{13}\text{C}$  HMQC of **9**.



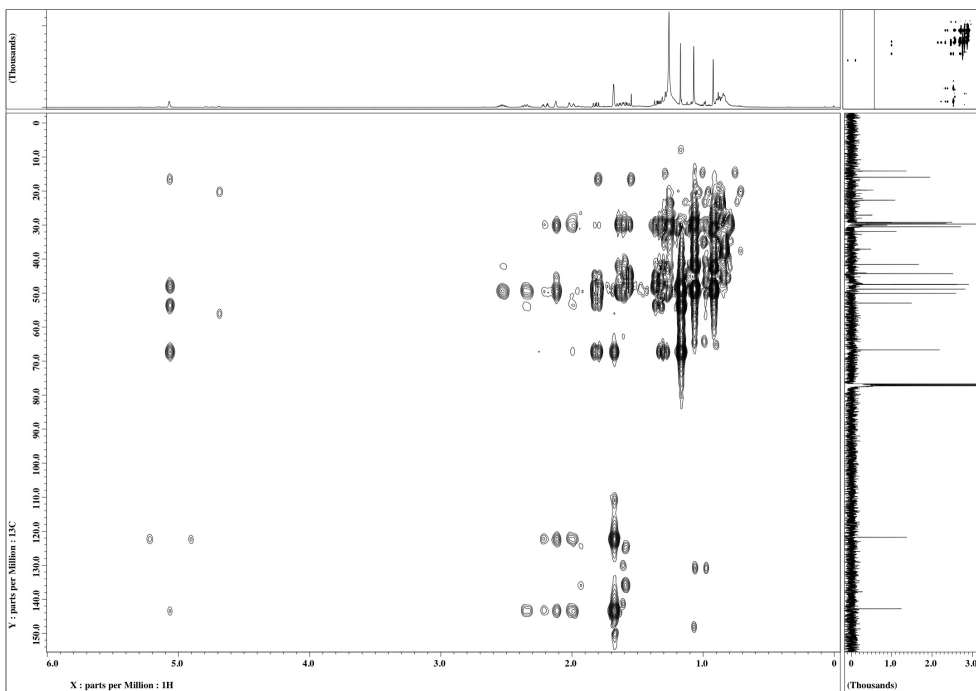

Figure S49.  $^1\text{H}$ - $^{13}\text{C}$  HMBC of **9**.

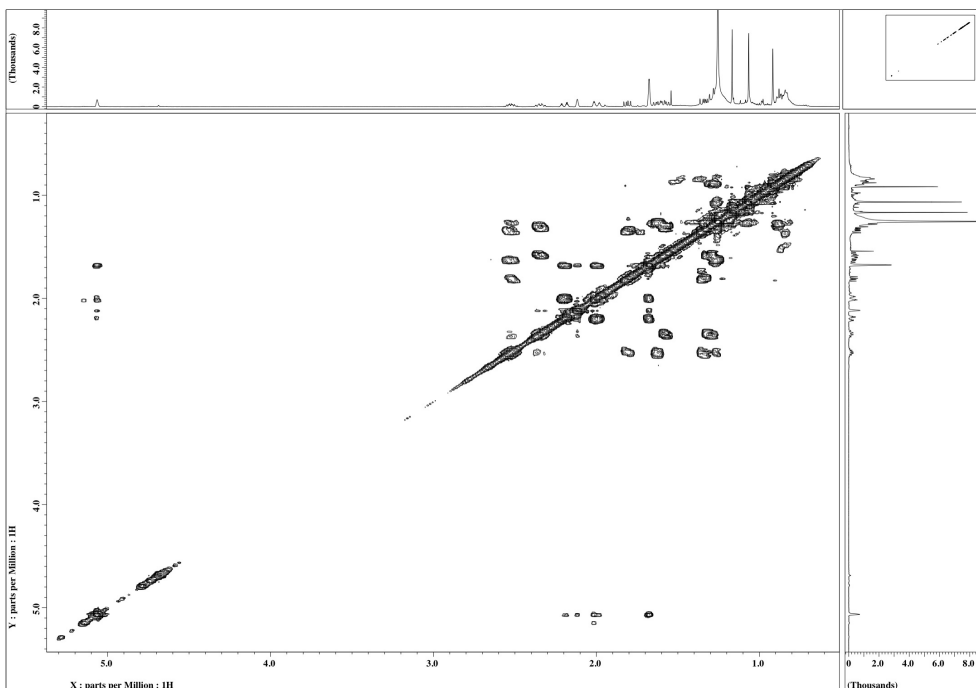

Figure S50.  $^1\text{H}$ - $^1\text{H}$  ROESY of **9**.

$^1\text{H}$ -NMR (500 MHz)

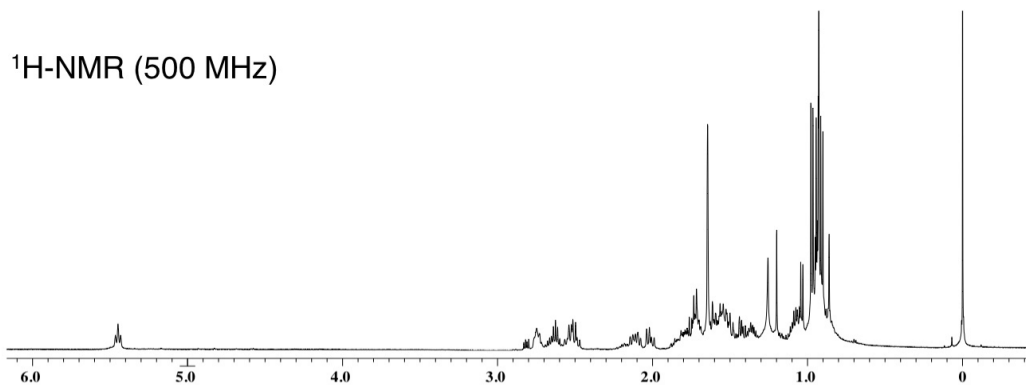

$^{13}\text{C}$ -NMR (125 MHz)

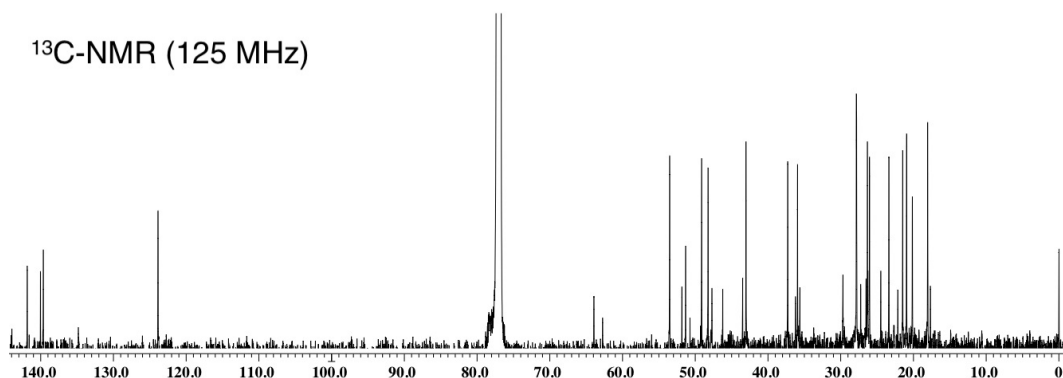

**Figure S51.**  $^1\text{H}$  (upper) and  $^{13}\text{C}$  (lower) NMR of cyclooctat-7(8),10(14)-diene (**10**).

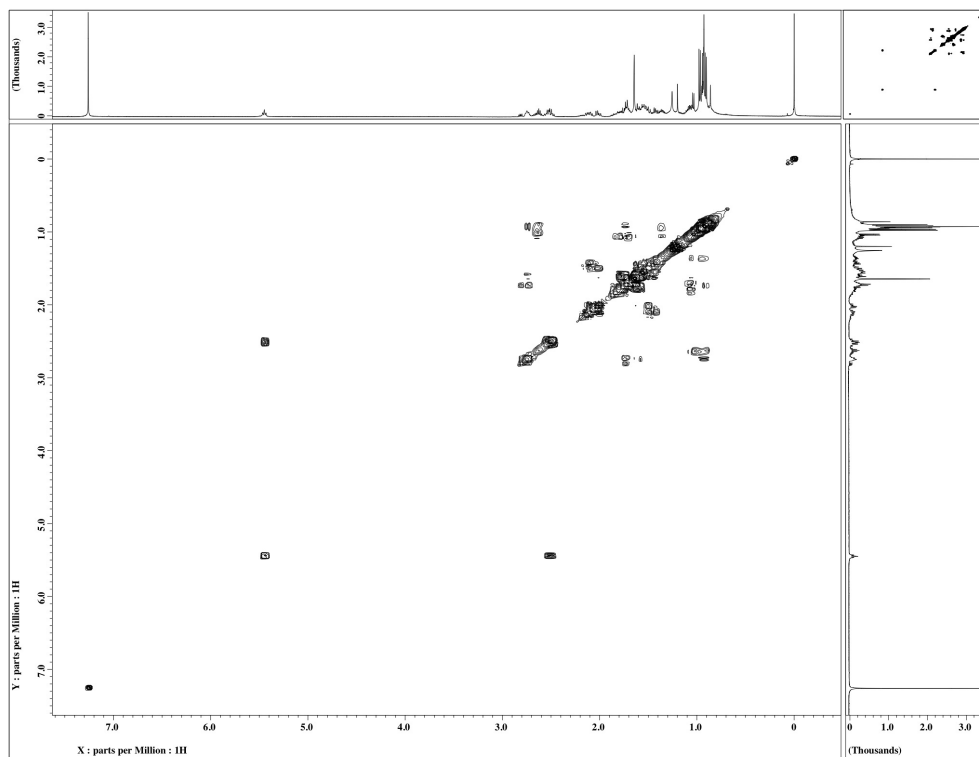

**Figure S52.**  $^1\text{H}$ - $^1\text{H}$  COSY of **10**.

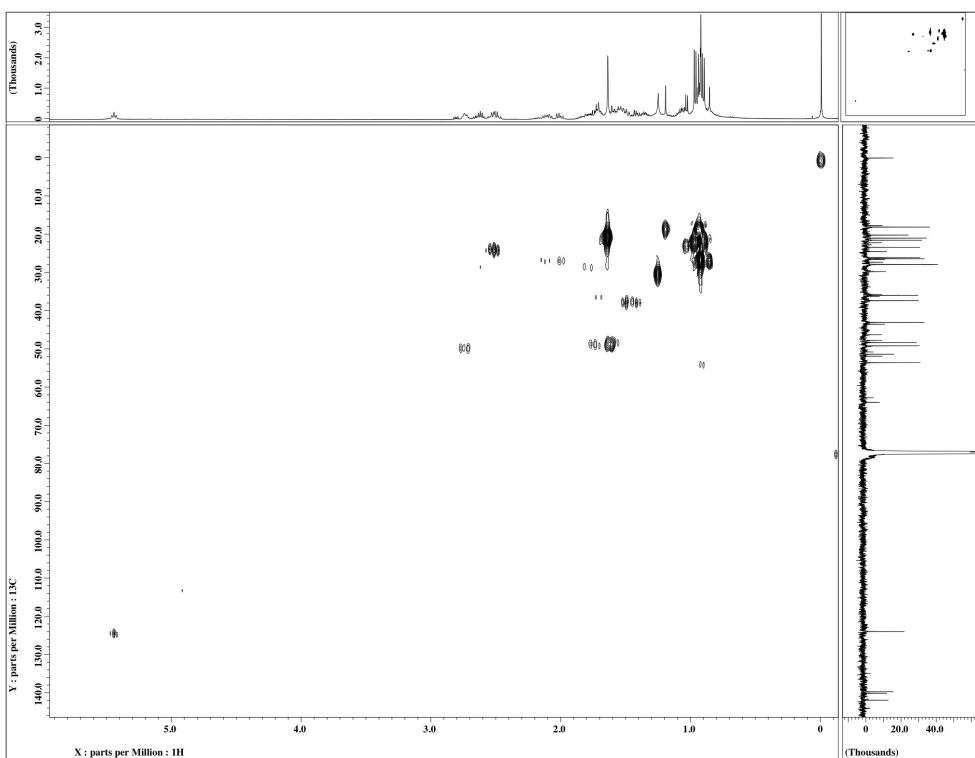

Figure S53.  $^1\text{H}$ - $^{13}\text{C}$  HMQC of 10.

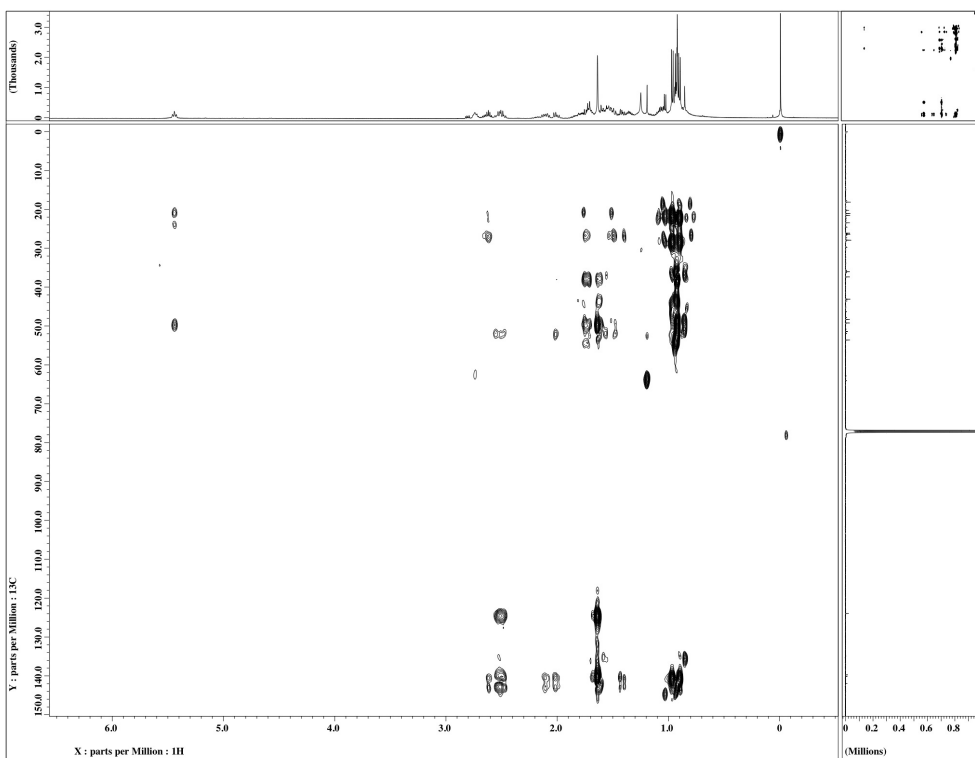

Figure S54.  $^1\text{H}$ - $^{13}\text{C}$  HMBC of 10.

$^1\text{H}$ -NMR (500 MHz)

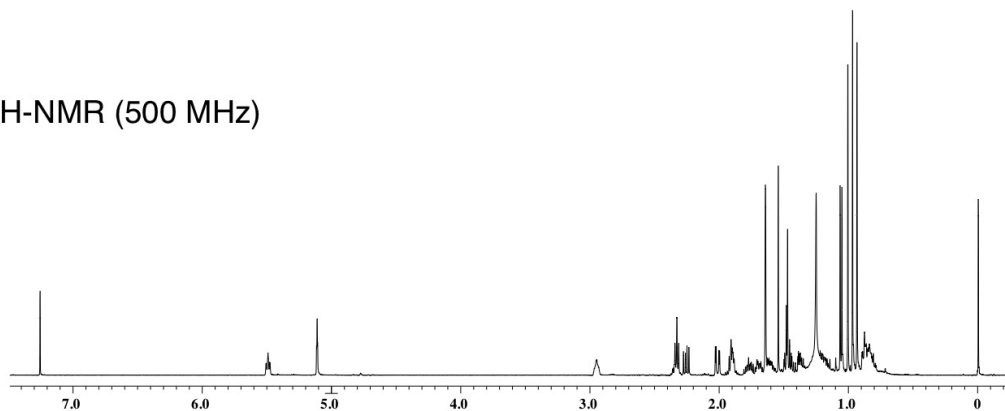

$^{13}\text{C}$ -NMR (125 MHz)

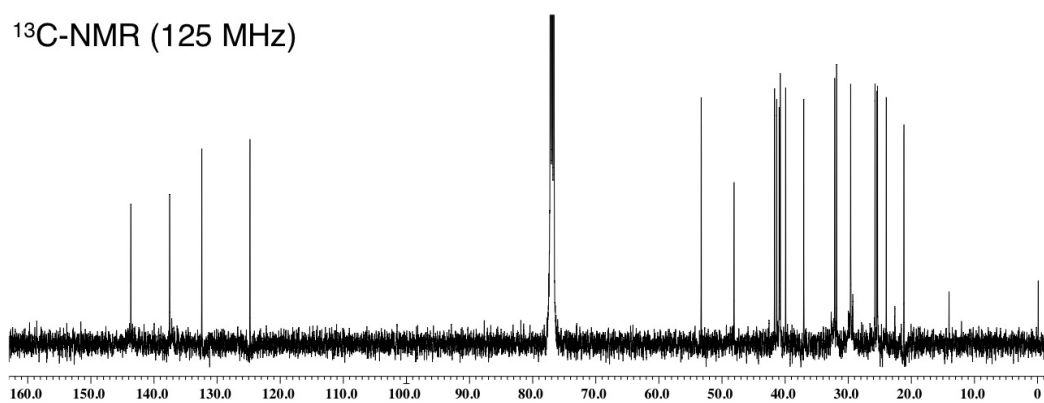

Figure S55.  $^1\text{H}$  (upper) and  $^{13}\text{C}$  (lower) NMR of tsukubadiene (**11**).

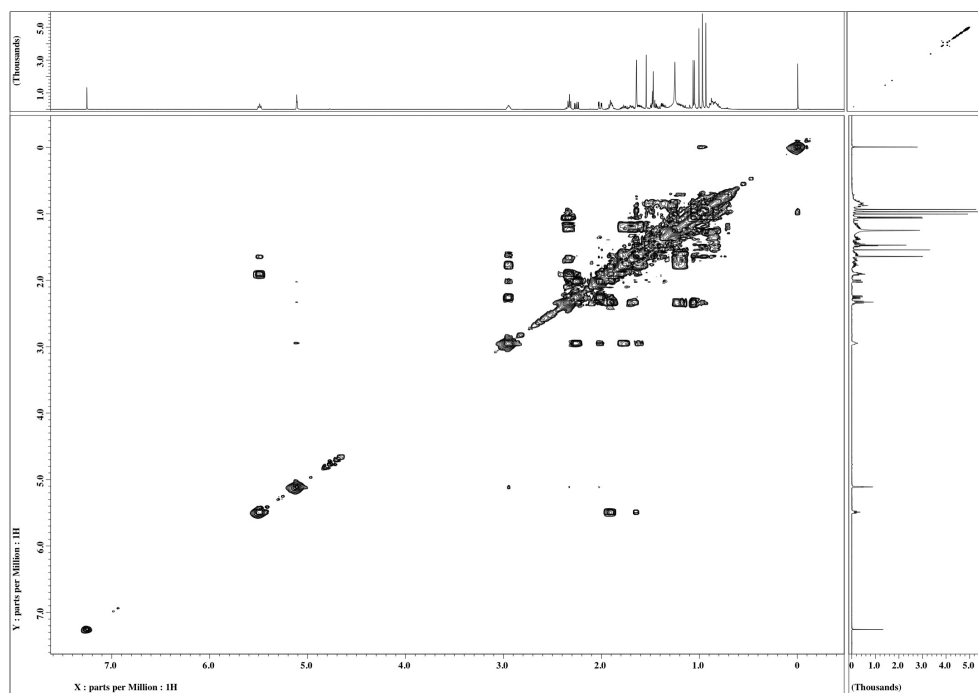

Figure S56.  $^1\text{H}$ - $^1\text{H}$  COSY of **11**.

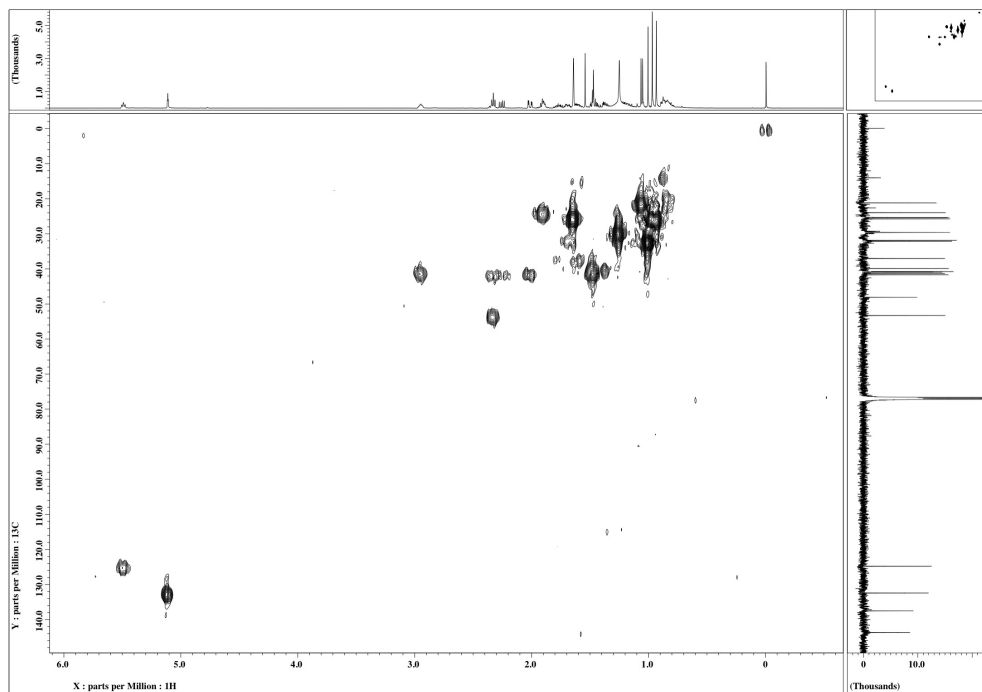

Figure S57.  $^1\text{H}$ - $^{13}\text{C}$  HMQC of **11**.

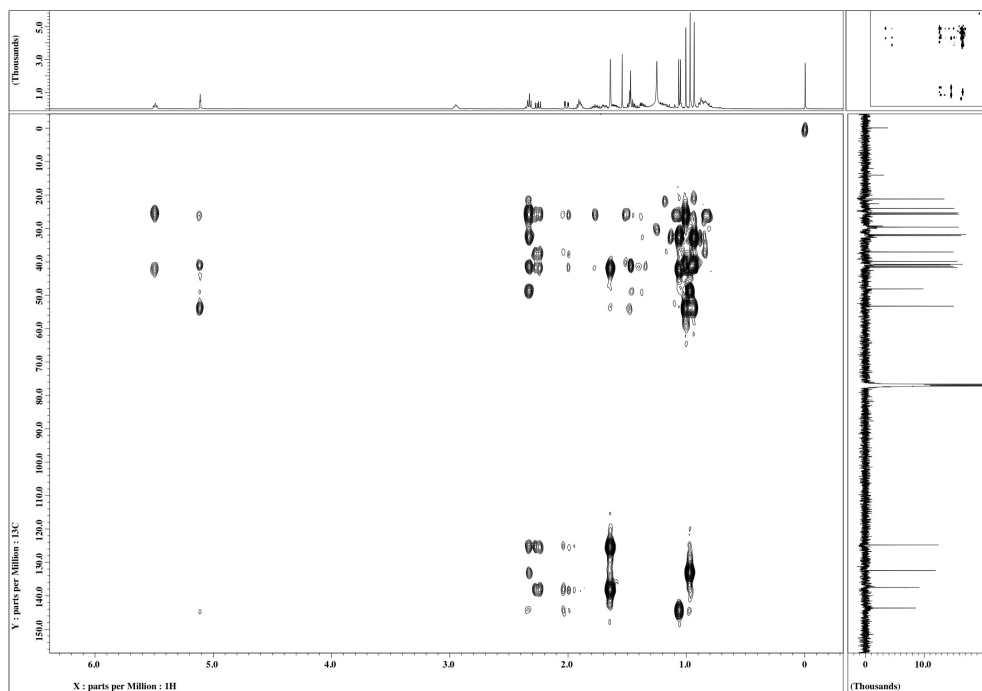

Figure S58.  $^1\text{H}$ - $^{13}\text{C}$  HMBC of **11**.

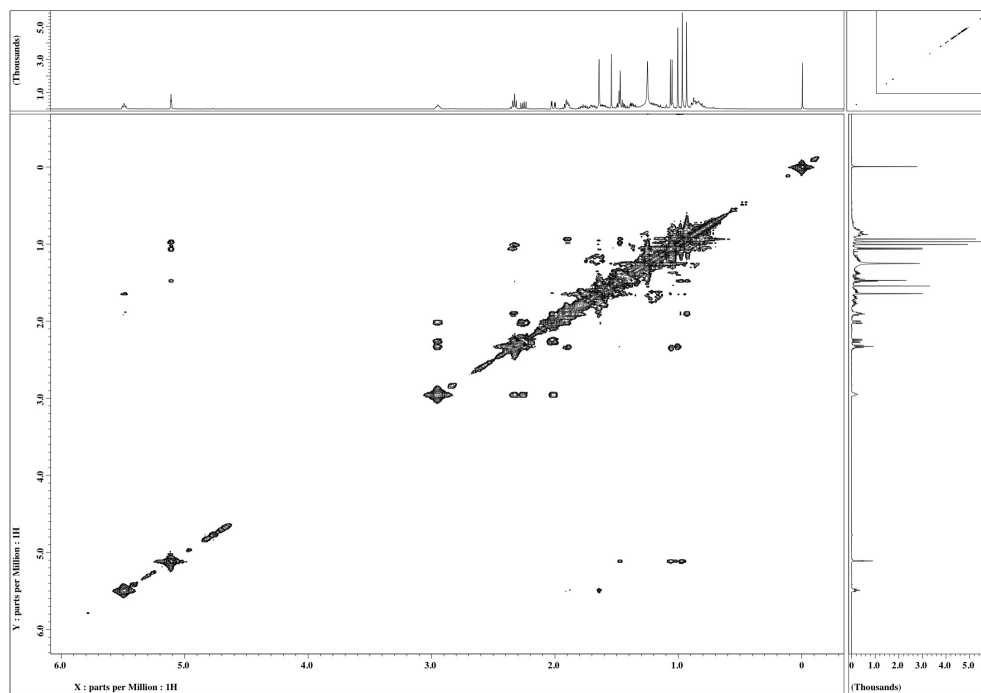

Figure S59.  $^1\text{H}$ - $^1\text{H}$  NOESY of **11**.

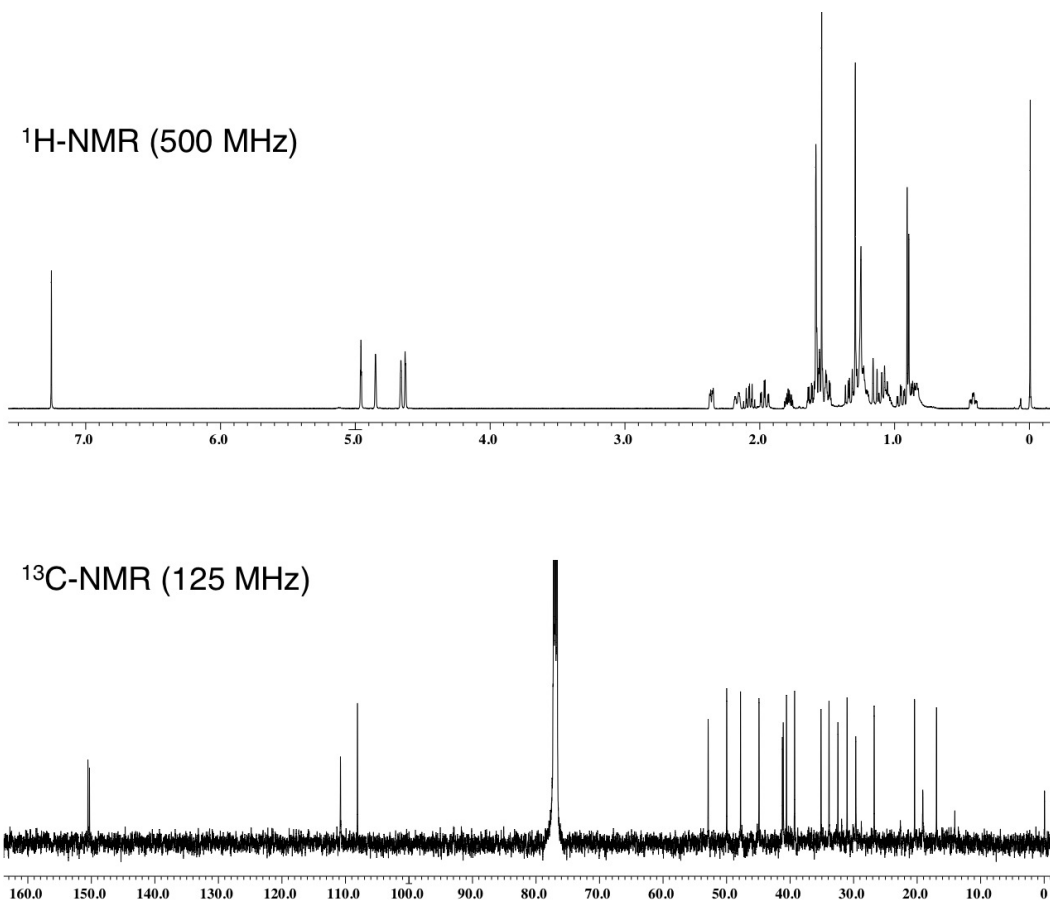

Figure S60.  $^1\text{H}$  (upper) and  $^{13}\text{C}$  (lower) NMR of odyverdiene A (**12**).

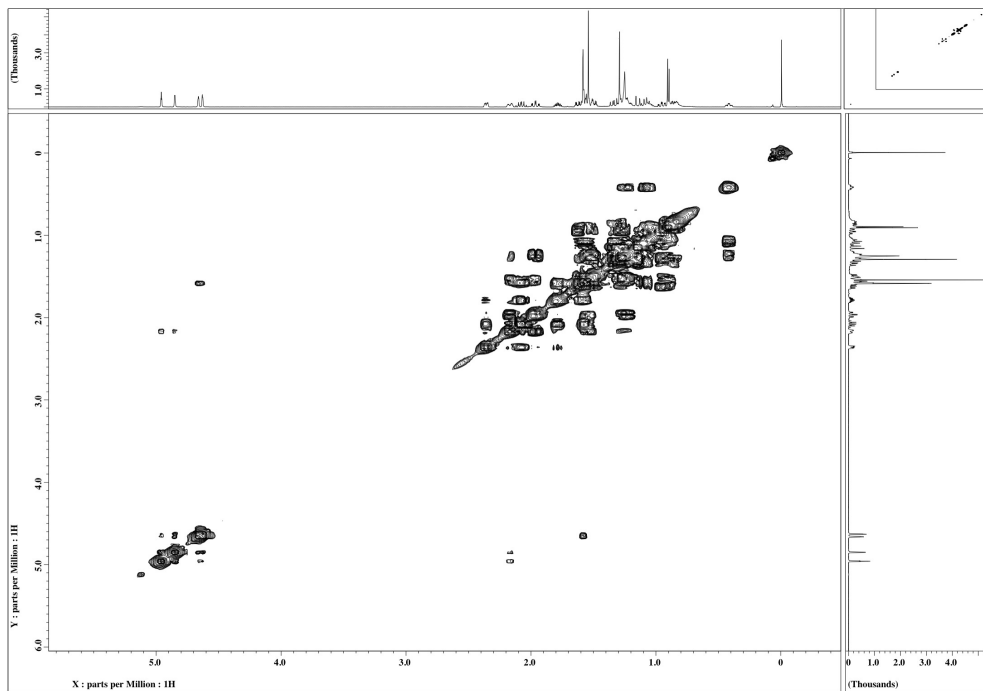

**Figure S61.**  $^1\text{H}$ - $^1\text{H}$  COSY of **12**.

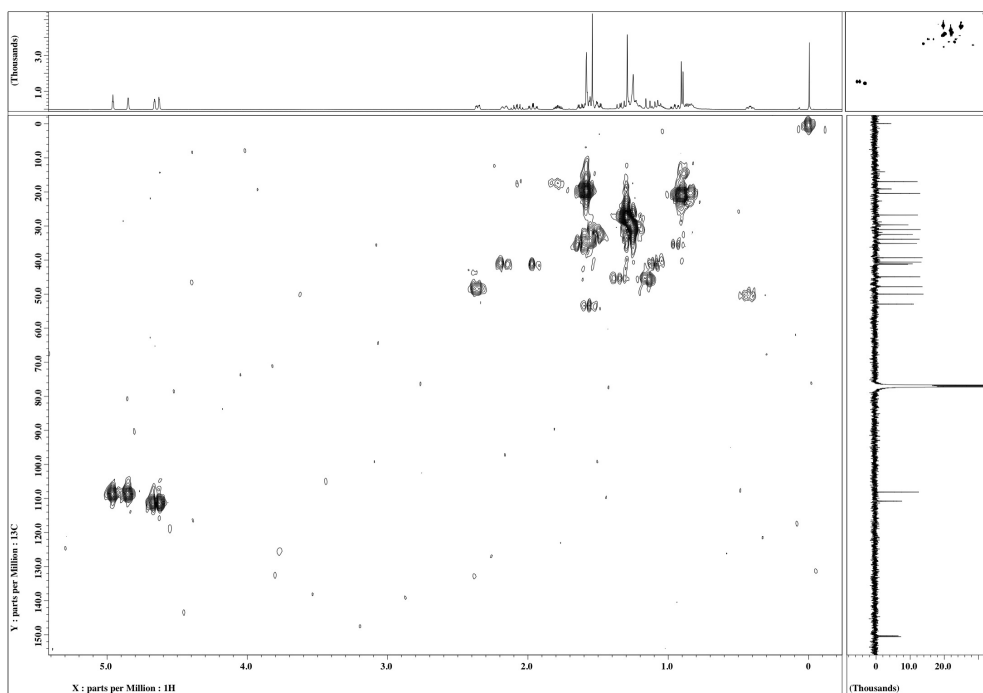

**Figure S62.**  $^1\text{H}$ - $^{13}\text{C}$  HMQC of **12**.

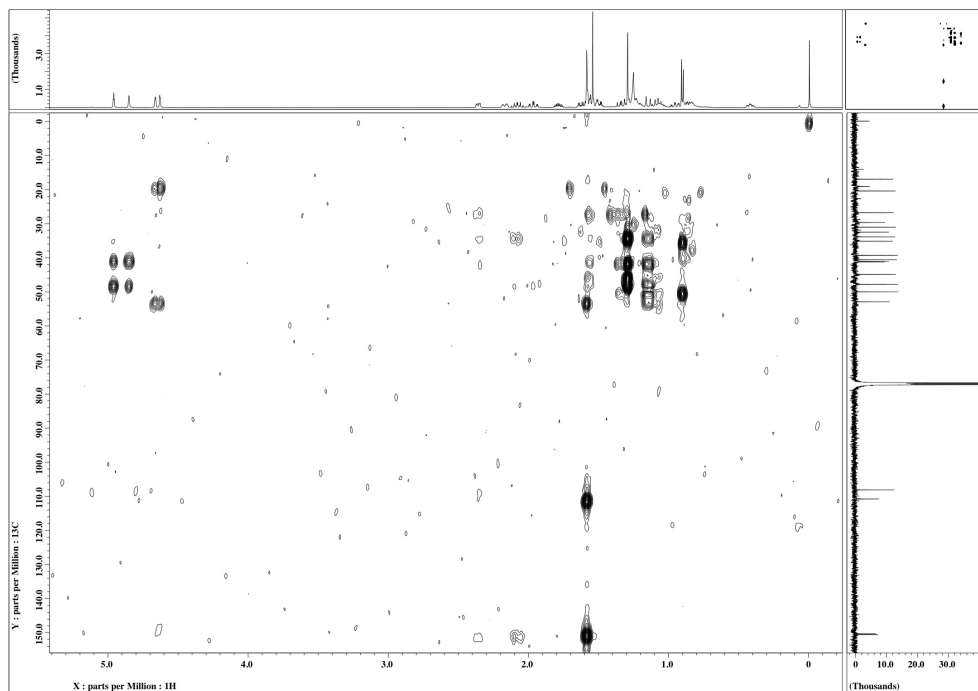

Figure S63.  $^1\text{H}$ - $^{13}\text{C}$  HMBC of **12**.

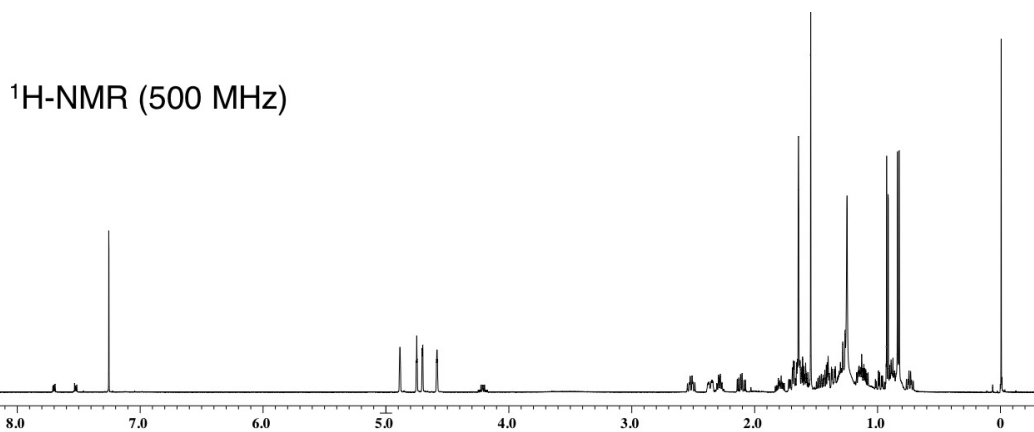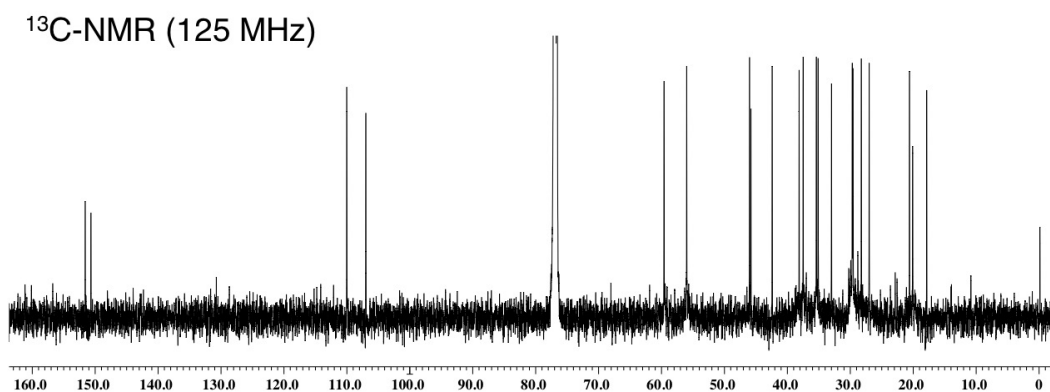

Figure S64.  $^1\text{H}$  (upper) and  $^{13}\text{C}$  (lower) NMR of odyverdiene B (**13**).



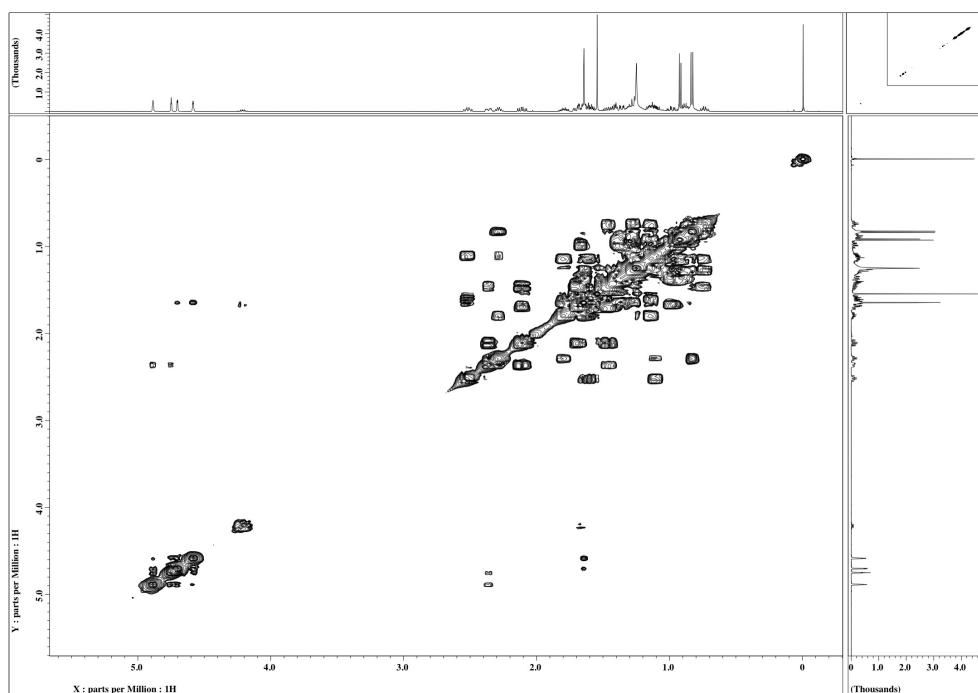

Figure S65.  $^1\text{H}$ - $^1\text{H}$  COSY of 13.

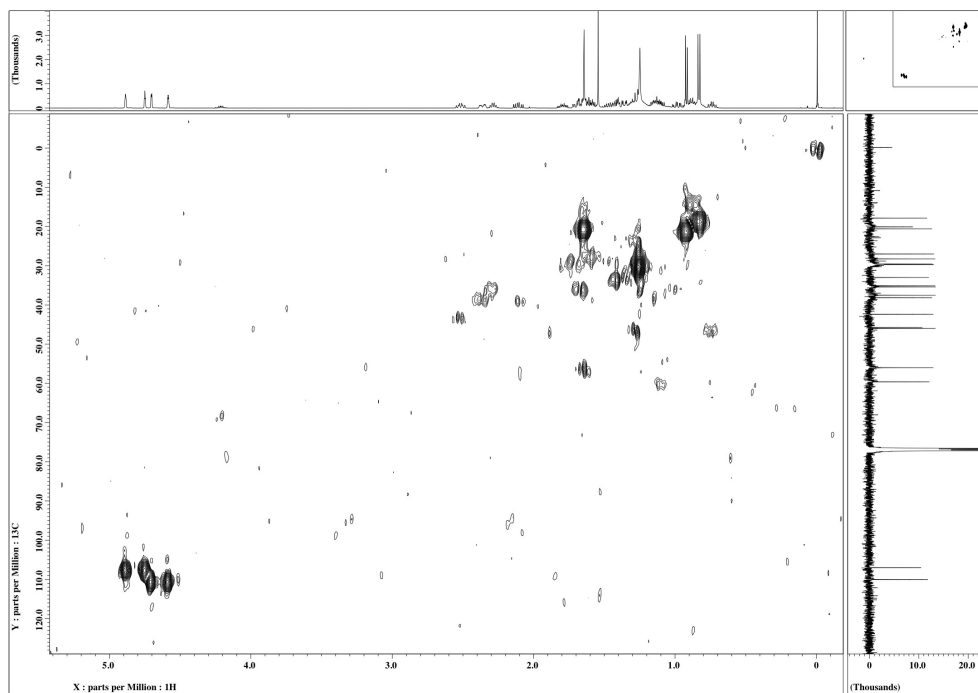

Figure S66.  $^1\text{H}$ - $^{13}\text{C}$  HMQC of 13.

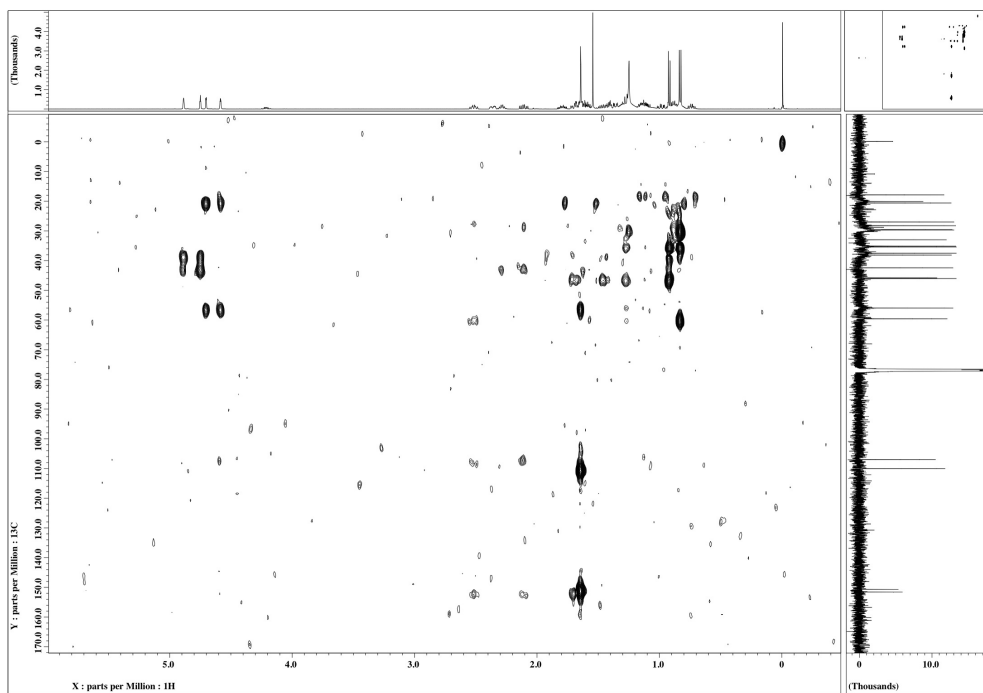

Figure S67.  $^1\text{H}$ - $^{13}\text{C}$  HMBC of 13.
